# Supplementary material for: Cigarette smoking and the risk of nasopharyngeal carcinoma: a meta-analysis of epidemiological studies
Source: PubMed Central journal article supplement — BMJ Open. 2017 Oct 5;7(10):e016582. doi: 10.1136/bmjopen-2017-016582 (PMC5640018; doi:10.1136/bmjopen-2017-016582), 2017-10-05
Supplement: bmjopen-2017-016582.draft_revisions.pdf [file bmjopen-2017-016582.draft_revisions.pdf]

# BMJ Open

BMJ Open is committed to open peer review. As part of this commitment we make the peer review history of every article we publish publicly available.

When an article is published we post the peer reviewers' comments and the authors' responses online. We also post the versions of the paper that were used during peer review. These are the versions that the peer review comments apply to.

The versions of the paper that follow are the versions that were submitted during the peer review process. They are not the versions of record or the final published versions. They should not be cited or distributed as the published version of this manuscript.

BMJ Open is an open access journal and the full, final, typeset and author-corrected version of record of the manuscript is available on our site with no access controls, subscription charges or pay-per-view fees (<http://bmjopen.bmj.com>).

If you have any questions on BMJ Open's open peer review process please email [editorial.bmjopen@bmj.com](mailto:editorial.bmjopen@bmj.com)

# BMJ Open

## Cigarette Smoking and the Risk of Nasopharyngeal Carcinoma: A Meta-Analysis of Epidemiological Studies

|                                 |                                                                                                                                                                                                                                                                                                                                                                           |
|---------------------------------|---------------------------------------------------------------------------------------------------------------------------------------------------------------------------------------------------------------------------------------------------------------------------------------------------------------------------------------------------------------------------|
| Journal:                        | <i>BMJ Open</i>                                                                                                                                                                                                                                                                                                                                                           |
| Manuscript ID                   | bmjopen-2017-016582                                                                                                                                                                                                                                                                                                                                                       |
| Article Type:                   | Research                                                                                                                                                                                                                                                                                                                                                                  |
| Date Submitted by the Author:   | 07-Apr-2017                                                                                                                                                                                                                                                                                                                                                               |
| Complete List of Authors:       | Long, Mengjuan; Wuhan University Zhongnan Hospital Department of Chemotherapy and Radiation Therapy<br>Fu, Zhenming; Wuhan University Renmin Hospital, Cancer Center<br>Li, Ping; Wuhan University Zhongnan Hospital Department of Chemotherapy and Radiation Therapy<br>Nie, Zhihua; Wuhan University Zhongnan Hospital Department of Chemotherapy and Radiation Therapy |
| <b>Primary Subject Heading</b>: | Oncology                                                                                                                                                                                                                                                                                                                                                                  |
| Secondary Subject Heading:      | Epidemiology, Public health                                                                                                                                                                                                                                                                                                                                               |
| Keywords:                       | Risk management < HEALTH SERVICES ADMINISTRATION & MANAGEMENT, Epidemiology < ONCOLOGY, Head & neck tumours < ONCOLOGY, PUBLIC HEALTH                                                                                                                                                                                                                                     |
|                                 |                                                                                                                                                                                                                                                                                                                                                                           |

SCHOLARONE™  
Manuscripts

1  
2  
3  
4 **Cigarette Smoking and the Risk of Nasopharyngeal Carcinoma: A**  
5  
6 **Meta-Analysis of Epidemiological Studies**  
7

8 Mengjuan Long<sup>1</sup>, Zhenming Fu<sup>1,2</sup>, Ping Li<sup>1</sup>, and Zhihua Nie<sup>1</sup>  
9

10  
11 <sup>1</sup>Department of Radiation and Medical Oncology, Zhongnan Hospital of Wuhan  
12  
13 University, Hubei, China  
14

15  
16 <sup>2</sup>Cancer Center, Renmin Hospital of Wuhan University, Hubei, China  
17  
18

19  
20 **Word count:** 3917  
21

22  
23  
24 **Keywords:** cigarette, smoker, nasopharyngeal carcinoma, risk factor, meta-analysis  
25  
26

27  
28 **Corresponding author:**  
29

30 Zhenming Fu, M.D., Ph.D., Mphil  
31

32 Cancer Center, Renmin Hospital of Wuhan University, Hubei, China  
33

34 No. 9 Zhangzhidong Street, Wuchang District, Wuhan 430060, Hubei, P. R. China  
35  
36

37 Email: davidfuzming@163.com  
38

39 Telephone: +86 189 8619 9927  
40  
41  
42  
43  
44  
45  
46  
47  
48  
49  
50  
51  
52  
53  
54  
55  
56  
57  
58  
59  
60

## Abstract

**Objective** The role of cigarette smoking as an independent risk factor for patients with nasopharyngeal carcinoma (NPC) is controversial. We attempted to provide evidence of reliable association between cigarette smoking and the risk of NPC.

**Design** Meta-analysis.

**Data sources** PubMed online and the Cochrane Library of relevant studies published up to February 2016.

**Eligibility criteria** All studies had to evaluated the relationship between NPC and cigarette smoking with nonsmokers as the reference group.

**Outcomes** The primary outcome was the adjusted OR, RR or HR of NPC patients comparing smoking with nonsmoking; the second was the crude OR, RR or HR.

**Results** We identified 17 case-control studies and four cohort studies including 5960 NPC cases and 429464 subjects. Compared with never smokers, current smokers and ever smokers had a 59% and a 56% greater risk of NPC respectively. A dose-response relation was identified in that risk estimate rose by 15% ( $P<0.001$ ) with every additional 10 pack-years of smoking, and risk increased with intensity of cigarette smoking ( $>30$  cigarettes per day). Significantly increased risk was only found among male smokers (Odds Ratio (OR), 1.36; 95% confidence interval (CI), 1.15-1.60), not among female smokers (OR, 1.58; 95% CI, 0.99-2.53). This finding also existed in the differentiated (OR, 2.34; 95% CI, 1.77-3.09) and the undifferentiated type of NPC (OR, 1.15; 95% CI, 0.90-1.46). Moreover, people started smoking at younger age ( $<18$ y) had a greater risk for developing NPC (OR, 1.78; 95% CI, 1.41-2.25).

**Conclusions** Cigarette smoking was associated with increased risk of NPC, especially for young smokers. However, we did not find statistical significant risks of NPC in females and in undifferentiated type, which might warrant further researches.

**Strengths and limitations of this study**

- Major strengths of our meta-analysis comprise new published studies being included, strict selection criteria, careful literature search, data extraction and analyses by two authors separately.
- The main limitations of our meta-analysis are study design, characteristics and size of study population, different outcome and variables used in eligible studies.

## Introduction

There were approximately 86,691 incident cases of NPC and 50,831 NPC-related deaths in 2012 worldwide [1]. Despite NPC is rare in developed countries, the overall incidence rate in Southeastern Asia is 6.5/100,000 person-years among males and 2.6/100,000 person-years among females [2]. Particularly, an age-standardized incidence rate of 20-50 per 100,000 males in south China presented a remarkably high incidence compared to that among white populations [3].

Cigarette smoking has been regarded as a risk factor for occurrence of a wide variety of malignancies, including respiratory tract, gastrointestinal and urogenital systems [4, 5]. Over the decades, some reports have suggested that cigarette smoking is associated with NPC risk [6]. However, the association has not been consistently demonstrated, some studies failed to find such a positive association [7-10]. The discrepancies of inconsistent outcome might be owing to variations in study population, methodology, definitions of cigarette smoking and so on. Furthermore, inevitable recall bias and confounding in case-control studies might further complicate the scenario [11, 12].

One recent meta-analysis of 28 case-control studies and 4 cohort studies reported the adverse effect of cigarette smoking on the incidence of NPC [13]. The pooled analysis showed that ever smokers had a 60% greater risk of developing the disease than never smokers. And there was a significant dose-dependent association. However, between-study heterogeneity was strikingly high across the overall analysis and still remained after stratified analyses. Specifically, some included studies might not be appropriate to be combined for synthetic analysis because of their inadequate reports about association between cigarette smoking and NPC risk [14-17], unclear definition of cigarette smoking and health condition of controls [18, 19], controls with a history of cancer [20], and inappropriate reference group [21, 22]. These might result in overestimating or underestimating the association of cigarette smoking on NPC risk, and thus the conclusions might be hard to interpret. In addition, new studies have been published recently which warrant an up-to-date analysis [23-26].

In this meta-analysis, we sought to provide a summary of available literature of

1  
2  
3 high quality to examine the association between cigarette smoking and the risk of  
4 NPC, we also assessed the gender and histological type differences in effects of  
5 cigarette smoking on the NPC risk.  
6  
7

## 8 9 **Methods**

### 10 *Literature search*

11  
12 This meta-analysis was performed on the basis of the Meta-analysis Of  
13 Observational Studies in Epidemiology (MOOSE) [27]. To identify all relevant  
14 publications on NPC and cigarette smoking, firstly, we searched the PubMed and  
15 Cochrane Library databases with terms “(((nasopharyngeal carcinoma OR  
16 nasopharyngeal cancer OR cancer of nasopharynx)) AND (smoking OR cigarette OR  
17 tobacco OR nicotine)) AND (etiology OR epidemiology OR environment OR risk  
18 factor) AND (Humans [Mesh])”, then we scrutinized the references of articles  
19 obtained from the database search for additional studies. Only publications in English  
20 were included.  
21  
22  
23  
24  
25  
26  
27  
28

### 29 *Selection criteria*

30  
31 The following criteria were applied for literature selection: (1) the study was  
32 case-control or cohort design; (2) controls were cancer-free; (3) cases were patients  
33 who were histopathologically confirmed NPC and had no other malignances; (4) the  
34 study evaluated the relationship between NPC and one of various aspects of cigarette  
35 smoking, including cigarette smoking status, smoking intensity, cumulative amount of  
36 cigarette smoking, age at onset and duration of smoking; (5) studies used nonsmokers  
37 as the reference group; (6) studies provided enough information to estimate the odds  
38 ratios (ORs) or the relative risk (RR) or hazard ratios (HRs) with 95% confidence  
39 interval (CI) for cigarette smoking variable. If multiple articles were on the same  
40 study population, the one with adequate information or most related or largest sample  
41 size was finally selected; furthermore, when there were separate data for gender or  
42 histologic type of NPC in one study, they were considered for additional subgroup  
43 analysis.  
44  
45  
46  
47  
48  
49  
50  
51  
52  
53  
54  
55

### 56 *Data extraction*

57  
58 The following data were extracted from eligible studies: first author, publication  
59  
60

1  
2  
3 year, study region, study design, sample size, control source, age of participants  
4 (range, mean), gender distribution, categories of smoking (status, intensity, pack-years,  
5 age at onset, et al.), method of questionnaire survey, duration of follow-up, end-point  
6 (for cohort study), covariates for adjustment, OR, RR or HR with their 95% CIs for  
7 each category of smoking exposure. In case the above effect sizes were not available,  
8 crude effect estimates and 95% CIs were calculated by provided number of subjects.  
9 All data were independently extracted and analyzed by two investigators; any  
10 inconsistency was resolved by consensus.  
11  
12  
13  
14  
15  
16  
17

### 18 *Quality assessment*

19  
20 The qualities of eligible studies were assessed by using the Newcastle-Ottawa  
21 Scale (NOS) [28], which comprised three parts assigned with a maximum of 9 points:  
22 selection, comparability, exposures and outcome condition. Two investigators  
23 evaluated all eligible publications separately and discrepancies were resolved by  
24 discussion.  
25  
26  
27  
28

### 29 *Data integration*

30  
31 Not all studies included in this meta-analysis provided consistent information  
32 about cigarette smoking, so we stipulated smoking status as follows: ever smokers,  
33 current smokers and former smokers. With regard to smoking quantity, we combined  
34 data extracted from all eligible publications into new categories: subjects with  
35 cigarettes consumption of <30 pack-years were assigned to light smokers, while those  
36 who consumed  $\geq 30$  pack-years were designated to heavy smokers. Similarly, for age  
37 at smoking onset, early group meant that subjects began smoking at <18 years old  
38 while later group defined as smoking at  $\geq 18$  years old. We also defined that regions  
39 with NPC incidence less than 1 per 100,000 person-years was low incidence rate  
40 group, 1-10 per 100,000 person-years was intermediate incidence rate group and  
41 greater than 10 per 100,000 was high incidence rate group.  
42  
43  
44  
45  
46  
47  
48  
49  
50  
51

### 52 *Statistical analysis*

53  
54 Since NPC is considered as a relatively rare outcome, relative risk and odds ratio  
55 were not differentiated, the odds ratios were used as effect size for all studies. We  
56 conducted fixed and random effects meta-analyses and the synthetic estimates did not  
57  
58  
59  
60



1  
2  
3 differ substantially between the two models. Therefore, random-effects (Der  
4 Simonian-Laird) model [29], generally regarded as the more conservative method,  
5 was applied to calculate point estimates for all analyses. Heterogeneity among articles  
6 was estimated by using the  $I^2$  statistic and  $p$  value associated with  $Q$  statistics [30].  
7  
8

9  
10 We conducted dose-response meta-analyses using the generalized least-squares  
11 method for trend estimation of summary dose-response data, as described by  
12 Greenland and Longnecker [31]. For non-linearity relationship, restricted cubic  
13 splines with four knots at percentiles 5%, 35%, 65% and 95% of the distribution were  
14 created and  $P$  value for non-linearity was computed by testing the null hypothesis that  
15 the coefficient of the second and the third splines were equal to zero [32].  
16  
17  
18  
19  
20  
21

22 To assess the robustness of our findings and the source of heterogeneity,  
23 meta-regression methods and stratified analyses were performed according to study  
24 design, incidence rate of regions, adjustment, score of eligible studies, categories of  
25 cigarette smoking, gender and NPC histological type (the latter three were only  
26 evaluated in stratified analysis). Sensitivity analysis was also conducted by deleting  
27 each study in turn to reflect the influence of every single study to the overall estimate.  
28 In addition, we evaluated the publication bias in the pooled analysis by Egger's test  
29 and the trim-and-fill method [33]. All statistical analyses were performed with Stata  
30 SE 12.0 software, and  $p$  value  $<0.05$  (two sides) was considered statistically  
31 significant.  
32  
33  
34  
35  
36  
37  
38  
39

#### 40 *Patient involvement*

41  
42 No patients were involved in this study.  
43  
44

## 45 **Results**

### 46 *Study characteristics*

47  
48 **Figure 1** shows the flow chart describing the sequential selection procedures of  
49 eligible studies. A total of 342 articles were identified, of which 302 articles were  
50 deemed irrelevant after reviewing the titles and abstracts. Subsequently, 40 articles  
51 were further scanned by full-text. Meanwhile, by searching all references of relevant  
52 articles, three additional articles were considered as potentially eligible. Among them  
53  
54  
55  
56  
57  
58 22 were excluded because of following reasons: five studies with inadequate  
59  
60

1  
2  
3 information for data extraction, four studies without report of the association between  
4 cigarette smoking and NPC risk, four studies with overlapped data, four studies did  
5 not designate never smokers as reference group, two studies included improper  
6 controls (for example, controls with malignancies or without description of health  
7 conditions), one without clear definition of cigarette smoking, one systematic review  
8 and one meta-analysis. Finally, 21 articles were eligible for qualitative synthesis,  
9 including seventeen case-control studies (5673 cases and 8653 controls) and four  
10 cohort studies (287 cases and 420,811 participants).  
11  
12

13  
14  
15 All of the studies in the overall analysis were published between 1985 and 2015.  
16  
17 Of these included studies, not all studies reported the estimates for all risk estimates.  
18  
19 Nineteen studies reported on ever smoking [7-10, 23, 25, 26, 34-45], ten on former  
20 smoking [7-9, 23, 26, 38, 39, 41, 46], eleven on current smoking [7-10, 23, 24, 26, 38,  
21 39, 41, 46], ten on pack-years of smoking [7, 23, 24, 26, 35, 37-39, 41, 43] and six on  
22 age onset of smoking [7, 9, 10, 23, 26, 46]. Additionally, five studies provided  
23 separate data of gender [35, 38, 41-43] and five studies reported the risk of NPC  
24 histological type associated with cigarette smoking [9, 38, 39, 42, 44]. As regarding to  
25 geographic region, eight studies were conducted in China [7, 8, 24, 26, 37, 41, 43, 44],  
26 five in the US [34, 35, 38, 39, 46], five in Southeast Asia region [10, 23, 25, 36, 40],  
27 two in Europe [9, 45] and one in Africa [42]. The summarized characteristics of the 21  
28 studies are presented in **Tables I and II**.  
29  
30  
31  
32  
33  
34  
35  
36  
37  
38  
39  
40

#### 41 *Association between cigarette smoking status and NPC*

42  
43 The pooled analysis of nineteen studies revealed a modest but significant  
44 increased risk of NPC among ever smokers against never smokers (OR, 1.56; 95% CI,  
45 1.32-1.83). Heterogeneity was obviously observed across the studies ( $I^2=66.8\%$ ,  
46  $P<0.01$ ). The pooled estimate for case-control studies was 1.61 (95% CI, 1.36-1.91;  
47 heterogeneity:  $I^2=65.8\%$ ,  $P<0.01$ ), whereas cohort studies presented a null association  
48 (OR, 1.11; 95% CI, 0.84-1.48; heterogeneity:  $I^2=0.0\%$ ,  $P=0.83$ ) (**Figure 2**).  
49  
50  
51  
52  
53

54 Similarly, eleven studies identified for the comparison of current smokers with  
55 NPC risk demonstrated positive result (OR, 1.59; 95% CI, 1.35-1.89; heterogeneity:  
56  $I^2=32.5\%$ ,  $P=0.14$ ). When analyzed by study design, the risk estimates were both  
57  
58  
59  
60

1  
2  
3 statistically significant for case-control and cohort studies. The pooled ORs were 1.67  
4 (95% CI, 1.06-2.61; heterogeneity:  $I^2=22.6\%$ ,  $P=0.25$ ) and 2.19 (95% CI: 1.02-4.72;  
5  
6 heterogeneity:  $I^2=65.0\%$ ,  $P=0.06$ ), respectively (**Table III**).

7  
8  
9 When compared with nonsmokers, former smokers from ten studies exhibited an  
10 increased risk of NPC (OR, 1.36; 95% CI, 1.15-1.61; heterogeneity:  $I^2=2.3\%$ ,  $P=0.42$ ).  
11 However, stratified analysis presented a void association in cohort studies (OR, 0.87;  
12 95% CI, 0.54-1.41; heterogeneity:  $I^2=0.0\%$ ,  $P=0.37$ ) but a significant association in  
13 case-control studies (OR, 1.45; 95% CI, 1.21-1.73; heterogeneity:  $I^2=0.0\%$ ,  $P=0.70$ )  
14  
15  
16  
17  
18  
19 (**Table III**).

20  
21 As for age at cigarette smoking onset, six studies reported the association with  
22 NPC risk. The pooled analysis revealed that early group (smoking at <18 years old)  
23 had significantly increased risk of NPC (OR, 1.78; 95% CI, 1.41-2.25; heterogeneity:  
24  $I^2=0.0\%$ ,  $P=0.94$ ), whereas later group (smoking at  $\geq 18$  years old) had slightly  
25 increased risk of NPC (OR, 1.28; 95% CI, 1.00-1.64; heterogeneity:  $I^2=0.0\%$ ,  $P=0.86$ )  
26  
27  
28  
29  
30  
31 (**Table III**).

### 32 *Dose-response analysis*

33  
34 For the cumulative amount of cigarette smoking, no between-study heterogeneity  
35 was found ( $I^2=0.0\%$ ,  $P>0.05$ ) with a pooled OR of 1.34 (95% CI, 1.13-1.58) for light  
36 smokers and 2.03 (95% CI, 1.57-2.61) for heavy smokers, respectively (**Table III**).  
37 The dose-response analysis showed statistical linear relationship between the  
38 cumulative number of pack-years and NPC risk ( $P_{\text{for linearity}}=0.83$ ) (**Figure 3**).  
39 Smokers had a 15% (OR, 1.15; 95% CI, 1.11-1.19,  $P<0.001$ ) increasing risk of NPC  
40 for every additional 10 pack-years smoked in comparison with never smokers (data  
41 not shown). When comparing the NPC risk for intensity of cigarettes smoked per day  
42 with nonsmokers, the non-linear dose-response relationship indicated that smokers  
43 with high exposure (>30 cigarettes/day) other than with low exposure have higher risk  
44 estimate, which presented an upward tendency in steeply rising trend ( $P_{\text{for}}$   
45 non-linearity<0.05) (**Figure 4**).

### 56 *Stratified analysis*

57  
58 When conducted stratified analysis by regions with different incidence rate, there  
59  
60

1  
2  
3 were nineteen studies compared NPC risk for ever smokers with that for never  
4 smokers. Among them, five studies carried out in regions with low NPC incidence  
5 rate yielded the highest risk (OR, 1.68; 95% CI, 1.36-2.07; heterogeneity:  $I^2=0.0\%$ ,  
6  $P=0.84$ ). The pooled estimates were 1.59 (95% CI, 1.21-2.09; heterogeneity:  
7  $I^2=78.8\%$ ,  $P<0.01$ ) for regions (ten studies) with intermediate NPC incidence rate and  
8 1.27 (95% CI, 1.05-1.53; heterogeneity:  $I^2=0.0\%$ ,  $P=0.52$ ) for regions (4 studies) with  
9 high incidence rate, respectively (**Table III**).

10  
11 We also performed stratified analysis by status of adjustment for confounding  
12 variables. Thirteen studies provided adjusted ORs for pooled analysis. But six studies  
13 either reported unadjusted ORs or reported the number of cases and controls which  
14 could be used to calculate the odds ratios. The estimates for the association of  
15 cigarette smoking and NPC risk in adjusted group (OR, 1.55; 95% CI, 1.26-1.91;  
16 heterogeneity:  $I^2=75.3\%$ ,  $P<0.01$ ) and in unadjusted group (OR, 1.57, 95% CI,  
17 1.27-1.93; heterogeneity:  $I^2=0.0\%$ ,  $P=0.68$ ) were similar (**Table III**).

18  
19 When the meta-regression analyses were applied to assess the sources of  
20 heterogeneity and their impacts on the NPC risk, we found that the publication year,  
21 study design, regions of different incidence rate and quality of studies were not  
22 significant sources of heterogeneity ( $P=0.55$ , data not shown).

#### 23 24 25 *Association between cigarette smoking and histological type of NPC*

26  
27 Specifically, the effects of cigarette smoking on NPC histological types were  
28 different. We found that significant association was only noted for differentiated  
29 squamous-cell NPC (OR, 2.34; 95% CI, 1.77-3.09; heterogeneity:  $I^2=0.0\%$ ,  $P=0.72$ ).  
30 Contrarily, the risk estimate for undifferentiated carcinoma of NPC in smokers was  
31 pointless in terms of statistics though the odds ratio was 1.15 (95% CI, 0.90-1.46;  
32 heterogeneity:  $I^2=0.0\%$ ,  $P=0.02$ ) (**Table III**).

#### 33 34 35 *Association between cigarette smoking of gender and NPC*

36  
37 Seven studies addressed the association between cigarette smoking and NPC risk  
38 by gender, including five in males and two in females. Compared with never smokers,  
39 increased risk for male smokers was noted (OR, 1.36; 95% CI, 1.15-1.60). However,  
40 an insignificant association (OR, 1.58; 95% CI, 0.99-2.53) was observed for female  
41  
42  
43  
44  
45  
46  
47  
48  
49  
50  
51  
52  
53  
54  
55  
56  
57  
58  
59  
60

1  
2  
3 smokers (**Table III**).

4  
5 *Sensitivity analysis and publication bias*

6  
7 Sensitivity analysis revealed that Ji 2011 study [42] was the source of statistical  
8 heterogeneity in the pooled analysis for ever smokers. When this outlier study was  
9 removed, between-study heterogeneity dropped strikingly to 27.3% in the remaining  
10 studies, whereas the odds ratios (OR, 1.47; 95% CI, 1.31-1.66) changed moderately  
11 but remained significant. As for case-control studies, the OR changed from 1.61 (95%  
12 CI: 1.36-1.91) to 1.52 (95% CI: 1.35-1.72) with heterogeneity fallen from 65.8% to  
13 23.5% (**Figure 5**). The findings were further verified in the intermediated incidence  
14 rate group (OR, 1.49, 95% CI, 1.21-1.82; heterogeneity:  $I^2=49.6%$ ,  $P=0.04$ ) and in the  
15 adjusted group (OR, 1.45; 95% CI, 1.25-1.69; heterogeneity:  $I^2=41.8%$ ,  $P=0.05$ ) (data  
16 not shown).  
17  
18  
19  
20  
21  
22  
23  
24  
25

26 Publication bias was evaluated by Egger's test and Trim-and-Fill method. Except  
27 for subgroup analyses with ever smokers and heavy smokers, no prominently  
28 significant publication bias (with  $P>0.05$  in Egger's test) was observed in our  
29 meta-analysis. After adjusted for publication bias, the risk of NPC remained stable  
30 with an OR of 1.56 (95% CI, 1.32-1.84) for ever smokers, but changed slightly (OR,  
31 1.80, 95% CI, 1.37-2.36) for heavy smokers (**Table III**).  
32  
33  
34  
35  
36

37 **Discussion**

38  
39 The results from this meta-analysis, based on seventeen case-control studies and  
40 four cohort studies, supported that there was moderate association between cigarette  
41 smoking and nasopharyngeal carcinoma risk, which was consistent with the result of  
42 previous meta-analysis [13].  
43  
44  
45  
46

47 *Interpretation*

48  
49 The pooled risk estimate for cohort studies comparing ever smokers to never  
50 smokers was not statistically significant. When conducted similar stratified analyses  
51 for current smokers and former smokers, we found that current smoking was  
52 significantly related to the risk of NPC while former smoking had an insignificant  
53 association with NPC risk. Considering the findings of stratified analyses, it might be  
54 the result from former smoking that contributed to the discrepancy between pooled  
55  
56  
57  
58  
59  
60

1  
2  
3 analysis for cohort studies and overall analysis. In addition, this meta-analysis  
4 demonstrated relatively high heterogeneity both for the overall analysis and subgroup  
5 analyses. When the Ji 2011 study [44] was removed from the synthetic analysis,  
6 heterogeneity was strikingly reduced in stratified analysis by study design and regions  
7 with different NPC incidence rate. Furthermore, the meta-regression analyses  
8 indicated that heterogeneity did not prominently result from publication year, study  
9 design, regions of different incident rate and quality of studies. To our knowledge,  
10 multiple lines of epidemiological studies had found that the development of NPC  
11 could be influenced by varieties of etiologies including Epstein-Barr virus (EBV),  
12 genetic components and other environmental factors, like preserved food,  
13 socioeconomic status, occupation, so on and so forth [6, 47-50]. Therefore, it might be  
14 its inappropriate subjects that contributed to selection bias which resulted in the high  
15 heterogeneity in the Ji 2011 study, though it had a large sample size with risk  
16 estimates adjusted by age, gender, alcohol intake and family history.  
17  
18  
19  
20  
21  
22  
23  
24  
25  
26  
27  
28  
29

30 One large cohort study [10], conducted in high-incidence region and comprised  
31 the majority of undifferentiated NPC (nearly 90% cases), did not reported statistically  
32 increased risk of NPC among current smokers compared with never smokers. The  
33 difference in the effect of current smoking on NPC risk may be due to its histological  
34 type of NPC because undifferentiated carcinoma in high-risk areas seemed more  
35 strongly related to Epstein-Barr virus infection other than cigarette smoking [48].  
36 Meanwhile, some case-control studies with small sample size of current smokers also  
37 had null results [7-9, 38, 39], of which two studies pointed out that significantly  
38 higher risk only existed for smokers with considerable levels of cigarette smoking  
39 (>20 cigarettes/day or >30 pack-years) [38, 39]. Nonetheless, the result of our  
40 integrated analysis for current smokers versus never smokers was generally consistent  
41 with that of the previous meta-analyses [13].  
42  
43  
44  
45  
46  
47  
48  
49  
50  
51

52 For former smokers, the less consistent risk estimates might result from small  
53 number of studies with adequate sample size. The estimates for former smokers in  
54 eight studies [7-10, 26, 39, 41, 46] presented null association on NPC risk which was  
55 parallel to the results of stratified analysis by study design, and only two studies [23,  
56  
57  
58  
59  
60

1  
2  
3 38] demonstrated statistically positive results. The discrepancies in the effects of  
4 former cigarette smoking on NPC risk might arise from the following aspects: the  
5 group of former smokers may have included people who had quit for a long time, and  
6 thus their risk might diminish or even reach the level of never smokers; the minimum  
7 period of time since quitting smoking in former smokers varied by study, which could  
8 result in judgement bias on the interviewed subjects in some studies.  
9

10  
11  
12  
13  
14  
15 This meta-analysis revealed that there was a clear dose-response relationship  
16 between cigarette smoking and the risk of NPC. That is, the more cigarette smoking  
17 (intensity of cigarettes smoked per day and the cumulative amount of pack-years), the  
18 higher risk for the development of NPC. Note that similar results have been widely  
19 observed for pancreatic cancer, liver cancer, renal carcinoma and gallbladder disease  
20 [51-54]. The exact explanation of this dose-dependent effect remains vague, it could  
21 be hypothesized that the more cigarette smoking, the greater impact on the epithelial  
22 cells of nasopharynx. Therefore, the risk of NPC would be higher in those who  
23 smoked more cigarettes. The actual mechanism about the relationship of the amount  
24 of smoking and NPC risk had been searched by molecular studies [55, 56], which  
25 pointed out that smoking is a factor for tumor growth and acts as a mutagen and DNA  
26 damaging agent that drives tumor initiation in normal epithelial cells of nasopharynx.  
27

28  
29  
30  
31  
32  
33  
34  
35  
36  
37 In this analysis, a statistically significant effect of smoking on NPC risk was  
38 observed in males but not in females. The gender difference in response to smoking  
39 might be related to interaction between protective endogenous or exogenous estrogens  
40 among women compared with men [57], and could also be explained by maturity of  
41 smoking trends among males and but not among females. Men might exposure to  
42 smoking for a longer duration as compared to women (34% of the male vs. 11% of the  
43 female had started smoking before the age of 15 years) [58]. However, the result of  
44 female ever smokers might not be adequately stable because only two studies reported  
45 the association between cigarette smoking and the risk of NPC for females [35, 41].  
46  
47  
48  
49  
50  
51  
52  
53

54  
55 Additionally, we found that the younger age people began to smoke, the higher  
56 risk they developed NPC. Our results showed that the pooled ORs were 1.78 (95% CI,  
57 1.41-2.25) for smokers in early group and 1.28 (95% CI, 1.00-1.64) in later group,  
58  
59

1  
2  
3  
4  
5  
6  
7  
8  
9  
10  
11  
12  
13  
14  
15  
16  
17  
18  
19  
20  
21  
22  
23  
24  
25  
26  
27  
28  
29  
30  
31  
32  
33  
34  
35  
36  
37  
38  
39  
40  
41  
42  
43  
44  
45  
46  
47  
48  
49  
50  
51  
52  
53  
54  
55  
56  
57  
58  
59  
60

respectively. Interestingly, the findings of previous meta-analysis appeared totally opposite with ORs of 1.17 (95% CI, 0.78-1.75) for early group and 1.58 (95% CI, 1.10-2.26) for later group [13]. Like many other cancers, NPC may take decades to develop from premalignant cells to detectable solid tumor. Thus, the exposure to carcinogenic agents early in life could have substantial impacts on the development of NPC [6, 59]. Moreover, the incidence of NPC peaks at age of 50-59 years in high-risk regions, while in western countries, the incidence of NPC peaks somewhat later ( $\geq 65$ -year-olds) [59]. As a result, the number of NPC patients in terms of age distribution could considerably vary in our eligible studies that were conducted in different countries.

When stratified by histological type of NPC, the pooled analysis presented a higher risk of differentiated NPC than that of undifferentiated NPC, and the later had an insignificant risk estimate. This difference might be owing to fewer studies included in the pooled analysis for undifferentiated NPC because we excluded those ineligible studies either for no report of the association between cigarette smoking and NPC risk [16] or for overlapped data [60]. It might avoid incorrect estimation of smoking effects on NPC risk. Moreover, we found that the risk estimates adversely associated with the NPC incidence rate. For example, the pooled OR for high incidence rate areas to low incidence rate areas ranged from 1.27 to 1.68. This might suggest there are substantial heterogeneity between NPC risk and smoking by histological types and geographic variations. Undifferentiated carcinoma of the nasopharynx is the predominant type in high-risk areas, and it is consistently associated with EBV infection, which may increase the carcinogenic effect of cigarette smoking [48].

### ***Generalizability***

The magnitude of association between cigarette smoking and the NPC risk was not as big as those for other smoking-related cancers like lung cancer and gastrointestinal malignancies [4]. However, NPC was quite epidemic in southeastern Asia especially in cities in southern China, and China was one of the largest tobacco producing and consuming countries in the world [61]. Besides, we found current



1  
2  
3 smokers are more related to the development of NPC with a higher risk estimate as  
4 compared to former smokers. These emphasized the importance and urgency of  
5 efforts to initiate the control of cigarette smoking to improve public health. Any  
6 efficient tobacco control programs would be helpful to reduce morbidity and mortality  
7 of smoking-related cancers worldwide.  
8  
9

### 10 11 12 **Limitations**

13  
14 The results of this meta-analysis should be explicated in the context of several  
15 limitations. For example, the design of included studies varied in source of subjects  
16 recruited, standardization for categories of cigarette smoking, in adjusted factors.  
17 Additionally, our meta-analysis was a mix of retrospective studies and prospective  
18 studies, and was lack of individual participant data for adjustment of potential  
19 confounders. Generally, Epstein-Barr virus infection was thought to be highly related  
20 to NPC risk [62]. However, a 22-year follow-up study carried out by Hsu et al.  
21 revealed that Epstein-Barr virus was less likely to modify the estimate for smoking  
22 associated with NPC risk [43]. And the links of other risk factors like dietary and  
23 social practices were often inconsistent between studies [62]. Moreover, the risk  
24 estimates of NPC resembled both in the group with adjusted odds ratio and in the  
25 group with unadjusted odds ratio in our meta-analysis.  
26  
27  
28  
29  
30  
31  
32  
33  
34  
35  
36

### 37 **Conclusions**

38  
39 This meta-analysis demonstrated that cigarette smoking associated with a modest,  
40 but statistically significant increased risk of NPC. Yet, further prospective studies are  
41 needed to elucidate the NPC risk in terms of gender, histological type, and for former  
42 smokers and smoking onset age.  
43  
44  
45  
46  
47  
48  
49  
50  
51  
52  
53  
54  
55  
56  
57  
58  
59  
60

1  
2  
3  
4  
5  
6  
7  
8  
9  
10  
11  
12  
**Contributor ship statement:** LMJ (Mengjuan Long) and LP (Ping Li) did the literate research and selected the eligible articles separately; LP (Ping Li) and NZH (Zhihua Nie) extracted the whole data and assessed the quality of our selected articles; LMJ integrated and analyzed data, and wrote the manuscript. FZM (Zhenming Fu) examined and revised the manuscript. All authors read and approved the final manuscript.

13  
14  
15  
**Funding:** This study was partially supported by grants 81472971 from the National Natural Science Foundation of China.

16  
17  
**Competing interests:** The authors declare no potential conflicts of interest.

18  
19  
**Data sharing statement:** No additional data are available.

## References

1. Ferlay J SI, et al. Cancer Incidence and Mortality Worldwide: IARC Cancer Base. *GLOBOCAN 2012 v1.0*.
2. Curado MP EB, et al. Cancer incidence in five continents. *Geneva: WHO Press 2007 vol. IX.*
3. Jemal A, Bray F, Center MM et al. Global cancer statistics. *CA Cancer J Clin 2011*; 1: 69-90.
4. Sasco AJ, Secretan MB, Straif K. Tobacco smoking and cancer: a brief review of recent epidemiological evidence. *Lung Cancer 2004*; 45 Suppl 2: S3-9.
5. Sandler RS, Sandler DP, Comstock GW et al. Cigarette smoking and the risk of colorectal cancer in women. *J Natl Cancer Inst 1988*; 80: 1329-1333.
6. Jia WH, Qin HD. Non-viral environmental risk factors for nasopharyngeal carcinoma: a systematic review. *Semin Cancer Biol 2012*; 22: 117-126.
7. Cheng YJ, Hildesheim A, Hsu MM et al. Cigarette smoking, alcohol consumption and risk of nasopharyngeal carcinoma in Taiwan. *Cancer Causes Control 1999*; 10: 201-207.
8. Zou J, Sun Q, Akiba S et al. A case-control study of nasopharyngeal carcinoma in the high background radiation areas of Yangjiang, China. *J Radiat Res 2000*; 41 Suppl: 53-62.
9. Polesel J, Franceschi S, Talamini R et al. Tobacco smoking, alcohol drinking, and the risk of different histological types of nasopharyngeal cancer in a low-risk population. *Oral Oncol 2011*; 47: 541-545.
10. Friberg JT, Yuan JM, Wang R et al. A prospective study of tobacco and alcohol use as risk factors for pharyngeal carcinomas in Singapore Chinese. *Cancer 2007*; 109: 1183-1191.
11. Grimes DA, Schulz KF. Bias and causal associations in observational research. *Lancet 2002*; 359: 248-252.
12. Weinberg CR. Toward a clearer definition of confounding. *Am J Epidemiol 1993*; 137: 1-8.
13. Xue WQ, Qin HD, Ruan HL et al. Quantitative association of tobacco smoking with the risk of nasopharyngeal carcinoma: a comprehensive meta-analysis of studies conducted between 1979 and 2011. *Am J Epidemiol 2013*; 178: 325-338.
14. Lin TM, Yang CS, Tu SM et al. Interaction of factors associated with cancer of the nasopharynx. *Cancer 1979*; 44: 1419-1423.
15. Chen CJ, Liang KY, Chang YS et al. Multiple risk factors of nasopharyngeal carcinoma: Epstein-Barr virus, malarial infection, cigarette smoking and familial tendency. *Anticancer Res 1990*; 10: 547-553.
16. Nesic V, Sipetic S, Vlajinac H et al. Risk factors for the occurrence of undifferentiated carcinoma of nasopharyngeal type: a case-control study. *Srp Arh Celok Lek 2010*; 138: 6-10.
17. Ren ZF, Liu WS, Qin HD et al. Effect of family history of cancers and environmental factors on risk of nasopharyngeal carcinoma in Guangdong, China. *Cancer Epidemiol 2010*; 34: 419-424.
18. Armstrong RW, Armstrong MJ, Yu MC, Henderson BE. Salted fish and inhalants as risk factors for nasopharyngeal carcinoma in Malaysian Chinese. *Cancer Res 1983*; 43: 2967-2970.
19. West S, Hildesheim A, Dosemeci M. Non-viral risk factors for nasopharyngeal carcinoma in the Philippines: results from a case-control study. *Int J Cancer 1993*; 55: 722-727.
20. Ng TP. A case-referent study of cancer of the nasal cavity and sinuses in Hong Kong. *Int J Epidemiol 1986*; 15: 171-175.
21. Guo X, Johnson RC, Deng H et al. Evaluation of nonviral risk factors for nasopharyngeal carcinoma in a high-risk population of Southern China. *Int J Cancer 2009*; 124: 2942-2947.
22. Ma F, Zhang H, Zhai Y et al. Functional polymorphism -31C/G in the promoter of BIRC5 gene

- and risk of nasopharyngeal carcinoma among chinese. *PLoS One* 2011; 6: e16748.
23. Fachiroh J, Sangrajrang S, Johansson M et al. Tobacco consumption and genetic susceptibility to nasopharyngeal carcinoma (NPC) in Thailand. *Cancer Causes Control* 2012; 23: 1995-2002.
24. Lin JH, Jiang CQ, Ho SY et al. Smoking and nasopharyngeal carcinoma mortality: a cohort study of 101,823 adults in Guangzhou, China. *BMC Cancer* 2015; 15: 906.
25. Lye MS, Visuvanathan S, Chong PP et al. Homozygous Wildtype of XPD K751Q Polymorphism Is Associated with Increased Risk of Nasopharyngeal Carcinoma in Malaysian Population. *PLoS One* 2015; 10: e0130530.
26. Xie SH, Yu IT, Tse LA et al. Tobacco smoking, family history, and the risk of nasopharyngeal carcinoma: a case-referent study in Hong Kong Chinese. *Cancer Causes Control* 2015; 26: 913-921.
27. Stroup DF, Berlin JA, Morton SC et al. Meta-analysis of observational studies in epidemiology: a proposal for reporting. Meta-analysis Of Observational Studies in Epidemiology (MOOSE) group. *Jama* 2000; 283: 2008-2012.
28. Wells G Sbea. The Newcastle-Ottawa Scale (NOS) for assessing the quality of nonrandomized studies in meta-analyses. Ottawa, Ontario, Canada: *Ottawa Health Research Institute* 2000.
29. DerSimonian R, Laird N. Meta-analysis in clinical trials. *Control Clin Trials* 1986; 7: 177-188.
30. Higgins JP, Thompson SG. Quantifying heterogeneity in a meta-analysis. *Stat Med* 2002; 21: 1539-1558.
31. Greenland S, Longnecker MP. Methods for trend estimation from summarized dose-response data, with applications to meta-analysis. *Am J Epidemiol* 1992; 135: 1301-1309.
32. Orsini N GS, et al. A procedure to tabulate and plot results after flexible modeling of a quantitative covariate. *Stata J* 2011; 11: 29.
33. Egger M, Davey Smith G, Schneider M, Minder C: Bias in meta-analysis detected by a simple, graphical test. *Bmj* 315: 629-634, 1997.
34. Mabuchi K, Bross DS, Kessler, II. Cigarette smoking and nasopharyngeal carcinoma. *Cancer* 1985; 55: 2874-2876.
35. Nam JM, McLaughlin JK, Blot WJ. Cigarette smoking, alcohol, and nasopharyngeal carcinoma: a case-control study among U.S. whites. *J Natl Cancer Inst* 1992; 84: 619-622.
36. Sriamporn S, Vatanasapt V, Pisani P et al. Environmental risk factors for nasopharyngeal carcinoma: a case-control study in northeastern Thailand. *Cancer Epidemiol Biomarkers Prev* 1992; 1: 345-348.
37. Yu MC, Garabrant DH, Huang TB, Henderson BE. Occupational and other non-dietary risk factors for nasopharyngeal carcinoma in Guangzhou, China. *Int J Cancer* 1990; 45: 1033-1039.
38. Zhu K, Levine RS, Brann EA et al. A population-based case-control study of the relationship between cigarette smoking and nasopharyngeal cancer (United States). *Cancer Causes Control* 1995; 6: 507-512.
39. Vaughan TL, Shapiro JA, Burt RD et al. Nasopharyngeal cancer in a low-risk population: defining risk factors by histological type. *Cancer Epidemiol Biomarkers Prev* 1996; 5: 587-593.
40. Challeng PK, Narain K, Das HK et al. Risk factors for cancer nasopharynx: a case-control study from Nagaland, India. *Natl Med J India* 2000; 13: 6-8.
41. Yuan JM, Wang XL, Xiang YB et al. Non-dietary risk factors for nasopharyngeal carcinoma in Shanghai, China. *Int J Cancer* 2000; 85: 364-369.
42. Feng BJ, Khyatti M, Ben-Ayoub W et al. Cannabis, tobacco and domestic fumes intake are associated with nasopharyngeal carcinoma in North Africa. *Br J Cancer* 2009; 101: 1207-1212.

43. Hsu WL, Chen JY, Chien YC et al. Independent effect of EBV and cigarette smoking on nasopharyngeal carcinoma: a 20-year follow-up study on 9,622 males without family history in Taiwan. *Cancer Epidemiol Biomarkers Prev* 2009; 18: 1218-1226.
44. Ji X, Zhang W, Xie C et al. Nasopharyngeal carcinoma risk by histologic type in central China: impact of smoking, alcohol and family history. *Int J Cancer* 2011; 129: 724-732.
45. Turkoz FP, Celenkoclu G, Dogu GG et al. Risk factors of nasopharyngeal carcinoma in Turkey-an epidemiological survey of the Anatolian Society of Medical Oncology. *Asian Pac J Cancer Prev* 2011; 12: 3017-3021.
46. Chow WH, McLaughlin JK, Hrubec Z et al. Tobacco use and nasopharyngeal carcinoma in a cohort of US veterans. *Int J Cancer* 1993; 55: 538-540.
47. Hildesheim A, West S, DeVeyra E et al. Herbal medicine use, Epstein-Barr virus, and risk of nasopharyngeal carcinoma. *Cancer Res* 1992; 52: 3048-3051.
48. Tsao SW, Tsang CM, Pang PS et al. The biology of EBV infection in human epithelial cells. *Semin Cancer Biol* 2012; 22: 137-143.
49. Polesel J, Serraino D, Negri E et al. Consumption of fruit, vegetables, and other food groups and the risk of nasopharyngeal carcinoma. *Cancer Causes Control* 2013; 24: 1157-1165.
50. He YQ, Xue WQ, Shen GP et al. Household inhalants exposure and nasopharyngeal carcinoma risk: a large-scale case-control study in Guangdong, China. *BMC Cancer* 2015; 15: 1022.
51. Zou L, Zhong R, Shen N et al. Non-linear dose-response relationship between cigarette smoking and pancreatic cancer risk: evidence from a meta-analysis of 42 observational studies. *Eur J Cancer* 2014; 50: 193-203.
52. Lee YC, Cohet C, Yang YC et al. Meta-analysis of epidemiologic studies on cigarette smoking and liver cancer. *Int J Epidemiol* 2009; 38: 1497-1511.
53. Hunt JD, van der Hel OL, McMillan GP et al. Renal cell carcinoma in relation to cigarette smoking: meta-analysis of 24 studies. *Int J Cancer* 2005; 114: 101-108.
54. Aune D, Vatten LJ, Boffetta P. Tobacco smoking and the risk of gallbladder disease. *Eur J Epidemiol* 2016; 31: 643-653.
55. Furmanski P. Revealing the mechanism of tissue damage due to tobacco use: finally, a smoking gun? *Am J Pathol* 2013; 182: 1489-1493.
56. Salem AF, Al-Zoubi MS, Whitaker-Menezes D et al. Cigarette smoke metabolically promotes cancer, via autophagy and premature aging in the host stromal microenvironment. *Cell Cycle* 2013; 12: 818-825.
57. Corrao G, Zambon A, Conti V et al. Menopause hormone replacement therapy and cancer risk: an Italian record linkage investigation. *Ann Oncol* 2008; 19: 150-155.
58. Peto R, Darby S, Deo H et al. Smoking, smoking cessation, and lung cancer in the UK since 1950: combination of national statistics with two case-control studies. *Bmj* 2000; 321: 323-329.
59. Chang ET, Adami HO. The enigmatic epidemiology of nasopharyngeal carcinoma. *Cancer Epidemiol Biomarkers Prev* 2006; 15: 1765-1777.
60. Nazar-Stewart V, Vaughan TL, Burt RD et al. Glutathione S-transferase M1 and susceptibility to nasopharyngeal carcinoma. *Cancer Epidemiol Biomarkers Prev* 1999; 8: 547-551.
61. Mackay J, Ritthiphakdee B, Reddy KS: Tobacco control in Asia. *Lancet* 2013; 381: 1581-1587.
62. Chua ML, Wee JT, Hui EP, Chan AT. Nasopharyngeal carcinoma. *Lancet* 2016; 387: 1012-1024.

### Figure Legends

Figure 1: Summary of literature search.

Figure 2: Forest plots for comparing the risk for NPC between ever smokers versus never smokers.

Figure 3: A linear relationship between the cumulative number of pack-years and NPC risk ( $P_{\text{for linearity}}=0.83$ ), with a 15% (95% CI: 1.11-1.19,  $P<0.001$ ) increasing risk of NPC for every additional 10 pack-years smoked in comparison with never smokers (The solid line depicts the pooled risk estimate of NPC associated with each 1-pack-year increment of cigarette smoking, the dashed line depicts the upper confidence interval, the dot line depicts the lower confidence interval).

Figure 4: A non-linear association between intensity of cigarette smoking and NPC risk ( $P_{\text{for non-linearity}}<0.05$ ) (The solid line depicts the pooled risk estimate of NPC associated with each 1 cigarette/day increment, the dashed lines depict the upper and the lower confidence interval, respectively).

Figure 5: Forest plots for comparing the risk for NPC between ever smokers versus never smokers after deleting the Ji 2011 study.

342 articles identified through database searching (n=)

1  
2 Articles irrelevant  
3 (n=302) according to title  
4 and/or abstract  
5

Potentially relevant articles  
(n=40)

3 articles identified in reference lists

43 articles assessed for eligibility by full-text

16 17 articles excluded:  
17 cannot extract eligible data  
18 for data overlapping  
19 did not assign never smokers  
20 as referents  
21 without report of NPC risk  
22  
23

5 articles excluded:  
1 systematic review  
1 meta-analysis  
1 with unclear definition of cigarette smoking  
2 with improper controls

21 articles were eligible for qualitative synthesis:  
17 case-control studies  
4 cohort studies

1  
2  
3  
4  
5  
6  
7  
8  
9  
10  
11  
12  
13  
14  
15  
16  
17  
18  
19  
20  
21  
22  
23  
24  
25  
26  
27  
28  
29  
30  
31  
32  
33  
34  
35  
36  
37  
38  
39  
40  
41  
42  
43  
44  
45  
46  
47  
48  
49  
50  
51  
52  
53  
54  
55  
56  
57  
58  
59  
60

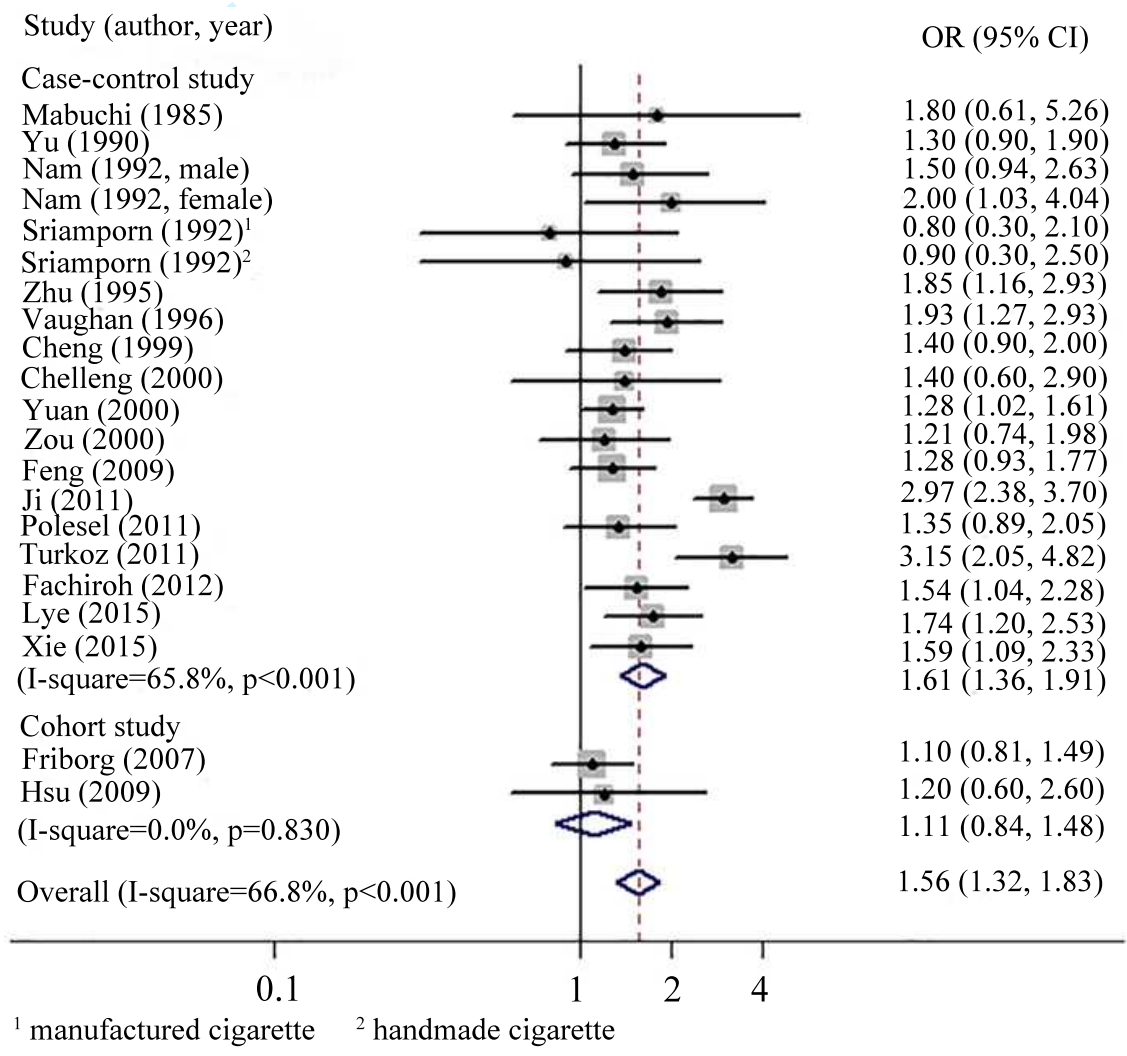



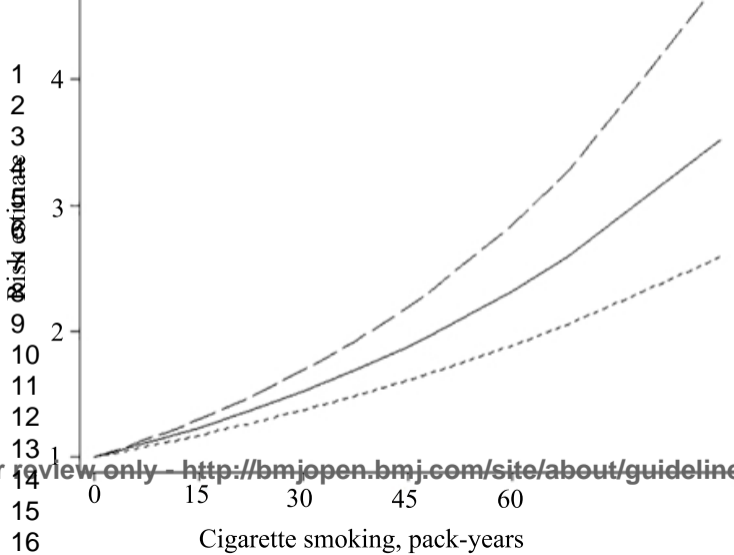

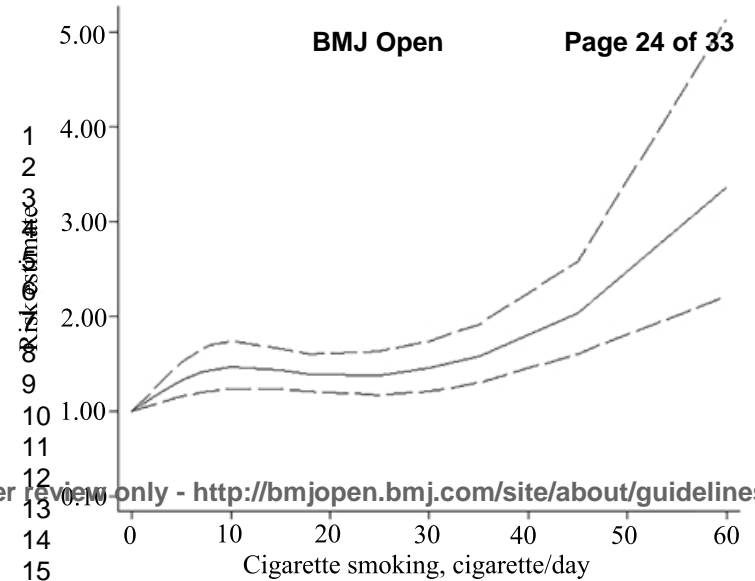

BMJ Open

OR (95% CI)

Case-control study

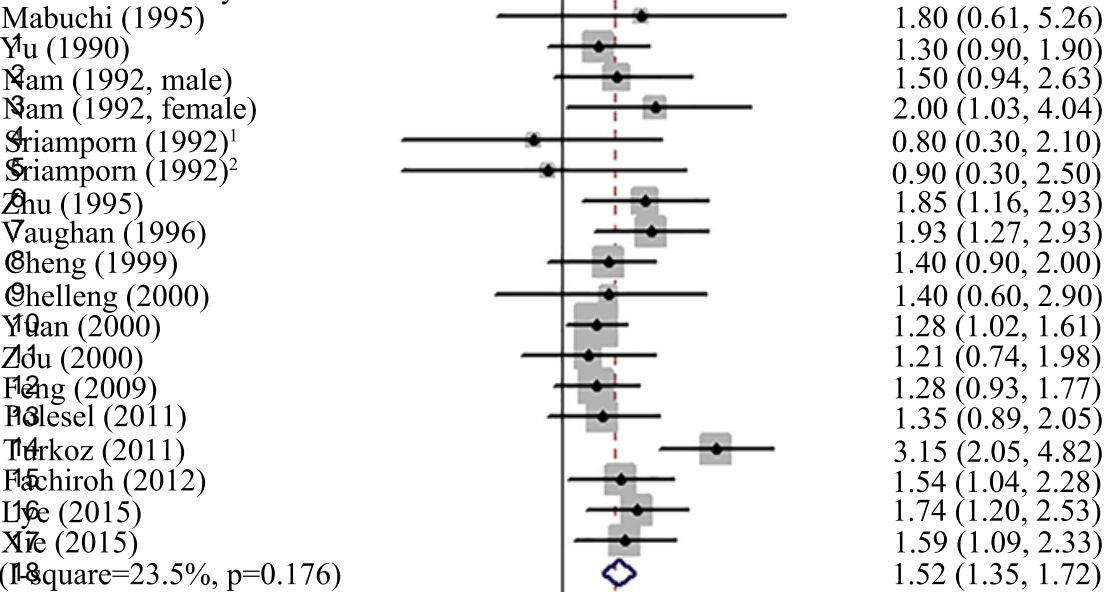

Cohort study

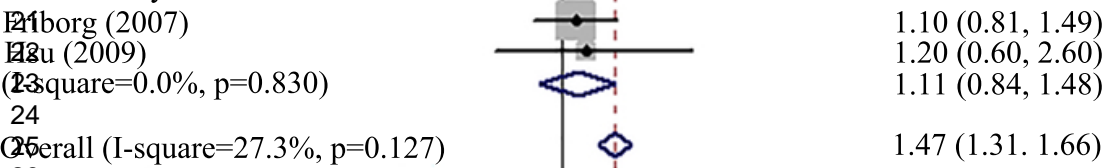

Overall (I-square=27.3%, p=0.127)

0.1

1

2

4

1 manufactured cigarette

2 handmade cigarette

**Table 1.** General characteristics of case-control studies used for meta-analysis

| Study                | Region    | Period    | Incidence rate | Cases/ Controls | Male/ Female | Age range (years old) | Quality score | Source of controls | Matching factors                                      | Adjusting factors                                                                                                                                     |
|----------------------|-----------|-----------|----------------|-----------------|--------------|-----------------------|---------------|--------------------|-------------------------------------------------------|-------------------------------------------------------------------------------------------------------------------------------------------------------|
| Mabuchi et al (34)   | the US    | —         | Low            | 39/39           | —            | —                     | 7             | Hospital-based     | Age, sex, race, education, occupation, marital status | —                                                                                                                                                     |
| Yu et al (37)        | Guangzhou | 1983-1985 | High           | 306/306         | 209/97       | Under 45              | 7             | Population-based   | Age, sex, residence, education                        | Birth place, marital status, dietary risk                                                                                                             |
| Nam et al (35)       | the US    | 1983-1986 | Low            | 204/408         | 141/63       | Under 65              | 5             | Hospital-based     | Age, sex                                              | By multiple logistic regression analysis                                                                                                              |
| Sriamporn et al (36) | Thailand  | 1987-1990 | Moderate       | 120/120         | 81/39        | mean 47.2             | 6             | Hospital-based     | Age, sex                                              | Age, sex, education, residence, occupation, consumption of salted fish and alcohol                                                                    |
| Zhu et al (38)       | the US    | 1984-1988 | Low            | 113/1910        | male         | —                     | 8             | Population-based   | —                                                     | Birth, education, background, medical history, occupation, alcohol intake                                                                             |
| Vaughan et al (39)   | the US    | 1987-1993 | Low            | 231/244         | 154/77       | mean 55.2             | 9             | Population-based   | Age, sex, region                                      | Age, sex, alcohol use, education                                                                                                                      |
| Cheng et al (7)      | Taiwan    | 1991-1994 | Moderate       | 375/327         | 260/115      | mean 46 (15-74)       | 7             | Population-based   | Age, sex, residence, education, marital status        | Age, sex, race, education, family history of NPC, drinking status                                                                                     |
| Challeng et al (40)  | India     | 1996-1997 | Moderate       | 47/94           | 34/13        | mean 43.7             | 6             | Population-based   | Age, sex, ethnicity                                   | —                                                                                                                                                     |
| Yuan et al (41)      | Shanghai  | 1987-1991 | Moderate       | 935/1032        | 668/267      | mean 50               | 8             | Population-based   | Age, sex, residence                                   | Age, gender, education, intake frequencies of preserved foods, occupational exposure history of chronic ear and nose condition, family history of NPC |

1  
2  
3  
4  
5  
6  
7  
8  
9  
10  
11  
12  
13  
14  
15  
16  
17  
18  
19  
20  
21  
22  
23  
24  
25  
26  
27  
28  
29  
30  
31  
32  
33  
34  
35  
36  
37  
38  
39  
40  
41  
42  
43  
44  
45  
46  
47  
48  
49

**Table 1.** Continued

| Study               | Region       | Period    | Incidence rate | Cases/ Controls | Male/ Female | Age range (years old) | Quality score | Source of controls | Matching factors                                      | Adjusting factors                                                                                                                                        |
|---------------------|--------------|-----------|----------------|-----------------|--------------|-----------------------|---------------|--------------------|-------------------------------------------------------|----------------------------------------------------------------------------------------------------------------------------------------------------------|
| Zou et al (51)      | Yangjiang    | 1987-1995 | High           | 97/192          | 83/14        | mean 52.6 (30-82)     | 7             | Population-based   | Age, sex, occupation                                  | —                                                                                                                                                        |
| Feng et al (42)     | North Africa | 2002-2005 | Moderate       | 440/409         | male         | —                     | 7             | Hospital-based     | Age, sex, ethnicity, center, childhood household type | Age, socioeconomic status, dietary risk factors                                                                                                          |
| Ji et al (44)       | Wuhan        | 1991-2009 | Moderate       | 1044/1095       | 755/289      | —                     | 5             | —                  | Age, sex, ethnicity                                   | Age, gender, cigarette, alcohol intake, family history                                                                                                   |
| Polesel et al (9)   | Italy        | 1992-2008 | Low            | 150/450         | 119/31       | median 52 (18-76)     | 6             | Hospital-based     | Age, sex, residence                                   | Age, sex, place of residence, education, alcohol intake                                                                                                  |
| Turkoz et al (45)   | Turkey       | —         | Moderate       | 183/183         | 122/61       | mean 44.9 (18-75)     | 6             | Hospital-based     | Age, sex                                              | Age, sex                                                                                                                                                 |
| Fachiroh et al (23) | Thailand     | 2005-2010 | Moderate       | 681/1078        | 504/177      | mean 49.8             | 6             | Hospital-based     | Age, sex, residence                                   | Age group, sex, center, education, alcohol drinking                                                                                                      |
| Lye et al (25)      | Malaysia     | 2007      | Moderate       | 356/356         | 276/80       | mean 53.2             | 6             | Hospital-based     | Age, sex, ethnicity                                   | Age, sex, ethnicity, salted fish and alcohol intake                                                                                                      |
| Xie et al (26)      | Hong Kong    | 2010-2012 | High           | 352/410         | 253/99       | mean 51.6             | 8             | Population-based   | Age, sex, ethnicity, residence district               | Age, sex, education, house type, family history of NPC, environmental tobacco smoke exposure, dietary risk, occupational exposure and cooking experience |

Table 2. General characteristics of cohort studies used for meta-analysis

| Study              | Region    | Period    | Incidence rate | Cohort size | No. of cases | Years of follow-up | End-point | Quality score | Source of cohort            | Adjusting factors                                     |
|--------------------|-----------|-----------|----------------|-------------|--------------|--------------------|-----------|---------------|-----------------------------|-------------------------------------------------------|
| Chow et al (46)    | the US    | 1954-1980 | Low            | 248046      | 48           | 26                 | Mortality | 6             | Veterans                    | Age, calendar year                                    |
| Friborg et al (10) | Singapore | 1993-2005 | High           | 61320       | 173          | 12                 | Morbidity | 9             | Population-based            | Age, sex, dialect group, year of interview, education |
| Hsu et al (43)     | Taiwan    | 1984-2006 | Moderate       | 9622        | 32           | mean 18.1          | Incidence | 9             | Population-based            | Age, two anti-EBV viral serum-markers                 |
| Lin et al (24)     | Guangzhou | 1988-1999 | High           | 101823      | 34           | mean 7.3           | Incidence | 8             | Factory workers and drivers | Age, sex, education, drinking status, occupation      |

Table 3. Subgroup analysis on pooled ORs for the association between cigarette smoking and nasopharyngeal carcinoma.

| Subgroup                 | No. of Studies | Effect estimate (95% CI) | Heterogeneity $I^2, P$ | Egger's Test $P$ value | Adjusted for Publication Bias |
|--------------------------|----------------|--------------------------|------------------------|------------------------|-------------------------------|
| <i>Smoking status</i>    |                |                          |                        |                        |                               |
| Ever smokers             | 19             | 1.56(1.32-1.83)          | 66.8%, <.01            | 0.29                   | 1.56(1.32-1.84)               |
| Current smokers          | 11             | 1.59 (1.35-1.89)         | 32.5%, .14             | 0.10                   |                               |
| Former smokers           | 10             | 1.36 (1.15-1.61)         | 2.3%, .42              | 0.97                   |                               |
| <i>Design</i>            |                |                          |                        |                        |                               |
| <i>Case-control</i>      |                |                          |                        |                        |                               |
| Current smokers          | 8              | 1.67(1.06-2.61)          | 22.6%, .25             | 0.58                   |                               |
| Former smokers           | 8              | 1.45(1.21-1.73)          | 0.0%, .70              | 0.98                   |                               |
| <i>Cohort</i>            |                |                          |                        |                        |                               |
| Current smokers          | 3              | 2.19(1.02-4.72)          | 65%, .06               | 0.16                   |                               |
| Former smokers           | 2              | 0.87(0.54-1.41)          | 0.0%, .37              | —                      |                               |
| <i>Pack-years</i>        |                |                          |                        |                        |                               |
| <30                      | 7              | 1.34 (1.13-1.58)         | 0.0%, .73              | 0.54                   |                               |
| ≥30                      | 6              | 2.03 (1.57-2.61)         | 0.0%, .45              | <0.01                  | 1.80(1.37-2.36)               |
| <i>Age at onset</i>      |                |                          |                        |                        |                               |
| <18y                     | 5              | 1.78 (1.41-2.25)         | 0.0%, .94              | 0.46                   |                               |
| ≥18y                     | 5              | 1.28 (1.00-1.64)         | 0.0%, .86              | 0.93                   |                               |
| <i>Incidence rate</i>    |                |                          |                        |                        |                               |
| Low                      | 5              | 1.68 (1.36-2.07)         | 0.0%, .84              | 0.64                   |                               |
| Intermediate             | 10             | 1.59 (1.21-2.09)         | 78.8%, <.01            | 0.29                   |                               |
| High                     | 4              | 1.27 (1.05-1.53)         | 0.0%, .52              | 0.63                   |                               |
| <i>Gender</i>            |                |                          |                        |                        |                               |
| Male                     | 5              | 1.36 (1.15-1.60)         | 0.0%, .68              | 0.48                   |                               |
| Female                   | 2              | 1.58 (0.99-2.53)         | 0.0%, .64              | —                      |                               |
| <i>Histological type</i> |                |                          |                        |                        |                               |
| Differentiated           | 5              | 2.34 (1.77-3.09)         | 0.0%, .72              | 0.64                   |                               |
| Undifferentiated         | 4              | 1.15 (0.90-1.46)         | 0.0%, .02              | 0.28                   |                               |
| <i>Adjustment</i>        |                |                          |                        |                        |                               |
| Adjusted                 | 13             | 1.55 (1.26-1.91)         | 75.4%, <.01            | 0.33                   |                               |
| Unadjusted               | 6              | 1.57 (1.27-1.93)         | 0.0%, .68              | 0.93                   |                               |

## MOOSE Checklist for Meta-analyses of Observational Studies

| Item No                                     | Recommendation                                                                                                                                                                                                                                                               | Reported on Page No |
|---------------------------------------------|------------------------------------------------------------------------------------------------------------------------------------------------------------------------------------------------------------------------------------------------------------------------------|---------------------|
| Reporting of background should include      |                                                                                                                                                                                                                                                                              |                     |
| 1                                           | Problem definition                                                                                                                                                                                                                                                           | 4                   |
| 2                                           | Hypothesis statement                                                                                                                                                                                                                                                         | 5                   |
| 3                                           | Description of study outcome(s)                                                                                                                                                                                                                                              | 5                   |
| 4                                           | Type of exposure or intervention used                                                                                                                                                                                                                                        | 4                   |
| 5                                           | Type of study designs used                                                                                                                                                                                                                                                   | 4                   |
| 6                                           | Study population                                                                                                                                                                                                                                                             | 8                   |
| Reporting of search strategy should include |                                                                                                                                                                                                                                                                              |                     |
| 7                                           | Qualifications of searchers (eg, librarians and investigators)                                                                                                                                                                                                               | None                |
| 8                                           | Search strategy, including time period included in the synthesis and key words                                                                                                                                                                                               | 5                   |
| 9                                           | Effort to include all available studies, including contact with authors                                                                                                                                                                                                      | 5                   |
| 10                                          | Databases and registries searched                                                                                                                                                                                                                                            | 5                   |
| 11                                          | Search software used, name and version, including special features used (eg, explosion)                                                                                                                                                                                      | 5                   |
| 12                                          | Use of hand searching (eg, reference lists of obtained articles)                                                                                                                                                                                                             | 5                   |
| 13                                          | List of citations located and those excluded, including justification                                                                                                                                                                                                        | 7                   |
| 14                                          | Method of addressing articles published in languages other than English                                                                                                                                                                                                      | 5                   |
| 15                                          | Method of handling abstracts and unpublished studies                                                                                                                                                                                                                         | 7                   |
| 16                                          | Description of any contact with authors                                                                                                                                                                                                                                      | None                |
| Reporting of methods should include         |                                                                                                                                                                                                                                                                              |                     |
| 17                                          | Description of relevance or appropriateness of studies assembled for assessing the hypothesis to be tested                                                                                                                                                                   | 5                   |
| 18                                          | Rationale for the selection and coding of data (eg, sound clinical principles or convenience)                                                                                                                                                                                | 5                   |
| 19                                          | Documentation of how data were classified and coded (eg, multiple raters, blinding and interrater reliability)                                                                                                                                                               | 6                   |
| 20                                          | Assessment of confounding (eg, comparability of cases and controls in studies where appropriate)                                                                                                                                                                             | 6                   |
| 21                                          | Assessment of study quality, including blinding of quality assessors, stratification or regression on possible predictors of study results                                                                                                                                   | 6                   |
| 22                                          | Assessment of heterogeneity                                                                                                                                                                                                                                                  | 7                   |
| 23                                          | Description of statistical methods (eg, complete description of fixed or random effects models, justification of whether the chosen models account for predictors of study results, dose-response models, or cumulative meta-analysis) in sufficient detail to be replicated | 6                   |
| 24                                          | Provision of appropriate tables and graphics                                                                                                                                                                                                                                 | 7                   |
| Reporting of results should include         |                                                                                                                                                                                                                                                                              |                     |
| 25                                          | Graphic summarizing individual study estimates and overall estimate                                                                                                                                                                                                          | 8                   |
| 26                                          | Table giving descriptive information for each study included                                                                                                                                                                                                                 | 20                  |
| 27                                          | Results of sensitivity testing (eg, subgroup analysis)                                                                                                                                                                                                                       | 9                   |
| 28                                          | Indication of statistical uncertainty of findings                                                                                                                                                                                                                            | 11                  |



| Item No                                 | Recommendation                                                                                                            | Reported on Page No |
|-----------------------------------------|---------------------------------------------------------------------------------------------------------------------------|---------------------|
| Reporting of discussion should include  |                                                                                                                           |                     |
| 29                                      | Quantitative assessment of bias (eg, publication bias)                                                                    | 12, 14              |
| 30                                      | Justification for exclusion (eg, exclusion of non-English language citations)                                             | None                |
| 31                                      | Assessment of quality of included studies                                                                                 | 12                  |
| Reporting of conclusions should include |                                                                                                                           |                     |
| 32                                      | Consideration of alternative explanations for observed results                                                            | 15                  |
| 33                                      | Generalization of the conclusions (ie, appropriate for the data presented and within the domain of the literature review) | 14                  |
| 34                                      | Guidelines for future research                                                                                            | 15                  |
| 35                                      | Disclosure of funding source                                                                                              | 16                  |

From: Stroup DF, Berlin JA, Morton SC, et al, for the Meta-analysis Of Observational Studies in Epidemiology (MOOSE) Group. Meta-analysis of Observational Studies in Epidemiology. A Proposal for Reporting. *JAMA*. 2000;283(15):2008-2012. doi: 10.1001/jama.283.15.2008.

Transcribed from the original paper within the NEUROSURGERY® Editorial Office, Atlanta, GA, United States. August 2012.

## STROBE Statement—checklist of items that should be included in reports of observational studies

|                              | Item No | Recommendation                                                                                                                                                                                                                                                                                                                                                                                                                                                                                                                                                                                                                                                                                                                      |
|------------------------------|---------|-------------------------------------------------------------------------------------------------------------------------------------------------------------------------------------------------------------------------------------------------------------------------------------------------------------------------------------------------------------------------------------------------------------------------------------------------------------------------------------------------------------------------------------------------------------------------------------------------------------------------------------------------------------------------------------------------------------------------------------|
| <b>Title and abstract</b>    | 1       | (a) Indicate the study's design with a commonly used term in the title or the abstract<br><b>Page 1</b><br>(b) Provide in the abstract an informative and balanced summary of what was done and what was found <b>Page 2</b>                                                                                                                                                                                                                                                                                                                                                                                                                                                                                                        |
| <b>Introduction</b>          |         |                                                                                                                                                                                                                                                                                                                                                                                                                                                                                                                                                                                                                                                                                                                                     |
| Background/rationale         | 2       | Explain the scientific background and rationale for the investigation being reported:<br><b>Page 4</b>                                                                                                                                                                                                                                                                                                                                                                                                                                                                                                                                                                                                                              |
| Objectives                   | 3       | State specific objectives, including any prespecified hypotheses <b>Page 4-5</b>                                                                                                                                                                                                                                                                                                                                                                                                                                                                                                                                                                                                                                                    |
| <b>Methods</b>               |         |                                                                                                                                                                                                                                                                                                                                                                                                                                                                                                                                                                                                                                                                                                                                     |
| Study design                 | 4       | Present key elements of study design early in the paper <b>Page 1-2</b>                                                                                                                                                                                                                                                                                                                                                                                                                                                                                                                                                                                                                                                             |
| Setting                      | 5       | Describe the setting, locations, and relevant dates, including periods of recruitment, exposure, follow-up, and data collection <b>Page 5-7</b>                                                                                                                                                                                                                                                                                                                                                                                                                                                                                                                                                                                     |
| Participants                 | 6       | (a) <i>Cohort study</i> —Give the eligibility criteria, and the sources and methods of selection of participants. Describe methods of follow-up<br><i>Case-control study</i> —Give the eligibility criteria, and the sources and methods of case ascertainment and control selection. Give the rationale for the choice of cases and controls<br><i>Cross-sectional study</i> —Give the eligibility criteria, and the sources and methods of selection of participants<br>(b) <i>Cohort study</i> —For matched studies, give matching criteria and number of exposed and unexposed<br><i>Case-control study</i> —For matched studies, give matching criteria and the number of controls per case<br><b>Page 6 and Table 1&amp;2</b> |
| Variables                    | 7       | Clearly define all outcomes, exposures, predictors, potential confounders, and effect modifiers. Give diagnostic criteria, if applicable                                                                                                                                                                                                                                                                                                                                                                                                                                                                                                                                                                                            |
| Data sources/<br>measurement | 8*      | For each variable of interest, give sources of data and details of methods of assessment (measurement). Describe comparability of assessment methods if there is more than one group <b>Page 5</b>                                                                                                                                                                                                                                                                                                                                                                                                                                                                                                                                  |
| Bias                         | 9       | Describe any efforts to address potential sources of bias <b>Page 3</b>                                                                                                                                                                                                                                                                                                                                                                                                                                                                                                                                                                                                                                                             |
| Study size                   | 10      | Explain how the study size was arrived at <b>Page 2 or 7</b>                                                                                                                                                                                                                                                                                                                                                                                                                                                                                                                                                                                                                                                                        |
| Quantitative variables       | 11      | Explain how quantitative variables were handled in the analyses. If applicable, describe which groupings were chosen and why <b>Page 5-6</b>                                                                                                                                                                                                                                                                                                                                                                                                                                                                                                                                                                                        |
| Statistical methods          | 12      | (a) Describe all statistical methods, including those used to control for confounding<br>(b) Describe any methods used to examine subgroups and interactions<br>(c) Explain how missing data were addressed<br>(d) <i>Cohort study</i> —If applicable, explain how loss to follow-up was addressed<br><i>Case-control study</i> —If applicable, explain how matching of cases and controls was addressed<br><i>Cross-sectional study</i> —If applicable, describe analytical methods taking account of sampling strategy<br>(e) Describe any sensitivity analyses<br><b>Page 6-7</b>                                                                                                                                                |

**Results**

|                  |     |                                                                                                                                                                                                                                                                                                                                                                                                                                   |
|------------------|-----|-----------------------------------------------------------------------------------------------------------------------------------------------------------------------------------------------------------------------------------------------------------------------------------------------------------------------------------------------------------------------------------------------------------------------------------|
| Participants     | 13* | (a) Report numbers of individuals at each stage of study—eg numbers potentially eligible, examined for eligibility, confirmed eligible, included in the study, completing follow-up, and analysed<br>(b) Give reasons for non-participation at each stage<br>(c) Consider use of a flow diagram<br><b>Page 7-8</b>                                                                                                                |
| Descriptive data | 14* | (a) Give characteristics of study participants (eg demographic, clinical, social) and information on exposures and potential confounders<br>(b) Indicate number of participants with missing data for each variable of interest<br>(c) <i>Cohort study</i> —Summarise follow-up time (eg, average and total amount)<br><b>Page 8</b>                                                                                              |
| Outcome data     | 15* | <i>Cohort study</i> —Report numbers of outcome events or summary measures over time<br><i>Case-control study</i> —Report numbers in each exposure category, or summary measures of exposure<br><i>Cross-sectional study</i> —Report numbers of outcome events or summary measures<br><b>Page 7-8</b>                                                                                                                              |
| Main results     | 16  | (a) Give unadjusted estimates and, if applicable, confounder-adjusted estimates and their precision (eg, 95% confidence interval). Make clear which confounders were adjusted for and why they were included<br>(b) Report category boundaries when continuous variables were categorized<br>(c) If relevant, consider translating estimates of relative risk into absolute risk for a meaningful time period<br><b>Page 8-11</b> |
| Other analyses   | 17  | Report other analyses done—eg analyses of subgroups and interactions, and sensitivity analyses <b>Page 10-11</b>                                                                                                                                                                                                                                                                                                                  |

**Discussion**

|                  |    |                                                                                                                                                                                              |
|------------------|----|----------------------------------------------------------------------------------------------------------------------------------------------------------------------------------------------|
| Key results      | 18 | Summarise key results with reference to study objectives <b>Page 11-14</b>                                                                                                                   |
| Limitations      | 19 | Discuss limitations of the study, taking into account sources of potential bias or imprecision. Discuss both direction and magnitude of any potential bias <b>Page 15</b>                    |
| Interpretation   | 20 | Give a cautious overall interpretation of results considering objectives, limitations, multiplicity of analyses, results from similar studies, and other relevant evidence <b>Page 11-14</b> |
| Generalisability | 21 | Discuss the generalisability (external validity) of the study results <b>Page 14-15</b>                                                                                                      |

**Other information**

|         |    |                                                                                                                                                                              |
|---------|----|------------------------------------------------------------------------------------------------------------------------------------------------------------------------------|
| Funding | 22 | Give the source of funding and the role of the funders for the present study and, if applicable, for the original study on which the present article is based <b>Page 16</b> |
|---------|----|------------------------------------------------------------------------------------------------------------------------------------------------------------------------------|

\*Give information separately for cases and controls in case-control studies and, if applicable, for exposed and unexposed groups in cohort and cross-sectional studies.

**Note:** An Explanation and Elaboration article discusses each checklist item and gives methodological background and published examples of transparent reporting. The STROBE checklist is best used in conjunction with this article (freely available on the Web sites of PLoS Medicine at <http://www.plosmedicine.org/>, Annals of Internal Medicine at <http://www.annals.org/>, and Epidemiology at <http://www.epidem.com/>). Information on the STROBE Initiative is available at [www.strobe-statement.org](http://www.strobe-statement.org).

# BMJ Open

## Cigarette Smoking and the Risk of Nasopharyngeal Carcinoma: A Meta-Analysis of Epidemiological Studies

|                                 |                                                                                                                                                                                                                                                                                                                                                                                                                                                                                                                            |
|---------------------------------|----------------------------------------------------------------------------------------------------------------------------------------------------------------------------------------------------------------------------------------------------------------------------------------------------------------------------------------------------------------------------------------------------------------------------------------------------------------------------------------------------------------------------|
| Journal:                        | <i>BMJ Open</i>                                                                                                                                                                                                                                                                                                                                                                                                                                                                                                            |
| Manuscript ID                   | bmjopen-2017-016582.R1                                                                                                                                                                                                                                                                                                                                                                                                                                                                                                     |
| Article Type:                   | Research                                                                                                                                                                                                                                                                                                                                                                                                                                                                                                                   |
| Date Submitted by the Author:   | 19-Jul-2017                                                                                                                                                                                                                                                                                                                                                                                                                                                                                                                |
| Complete List of Authors:       | Long, Mengjuan; Wuhan University Zhongnan Hospital Department of Chemotherapy and Radiation Therapy; Wuhan University Renmin Hospital, Department of Pediatrics<br>Fu, Zhenming; Wuhan University Zhongnan Hospital Department of Chemotherapy and Radiation Therapy; Wuhan University Renmin Hospital, Cancer Center<br>Li, Ping; Wuhan University Zhongnan Hospital Department of Chemotherapy and Radiation Therapy<br>Nie, Zhihua; Wuhan University Zhongnan Hospital Department of Chemotherapy and Radiation Therapy |
| <b>Primary Subject Heading</b>: | Oncology                                                                                                                                                                                                                                                                                                                                                                                                                                                                                                                   |
| Secondary Subject Heading:      | Epidemiology, Public health                                                                                                                                                                                                                                                                                                                                                                                                                                                                                                |
| Keywords:                       | Risk management < HEALTH SERVICES ADMINISTRATION & MANAGEMENT, Epidemiology < ONCOLOGY, Head & neck tumours < ONCOLOGY, PUBLIC HEALTH                                                                                                                                                                                                                                                                                                                                                                                      |
|                                 |                                                                                                                                                                                                                                                                                                                                                                                                                                                                                                                            |

SCHOLARONE™  
Manuscripts

only

1  
2  
3  
4 **Cigarette Smoking and the Risk of Nasopharyngeal Carcinoma: A**  
5  
6 **Meta-Analysis of Epidemiological Studies**  
7

8 Mengjuan Long<sup>1,2</sup>, Zhenming Fu<sup>1,3</sup>, Ping Li<sup>1</sup>, and Zihua Nie<sup>1</sup>  
9

10  
11 <sup>1</sup>Department of Radiation and Medical Oncology, Zhongnan Hospital of Wuhan  
12  
13 University, Hubei, China  
14

15  
16 <sup>2</sup>Department of Pediatrics, Renmin Hospital of Wuhan university, Hubei, China  
17

18  
19 <sup>3</sup>Cancer Center, Renmin Hospital of Wuhan University, Hubei, China  
20

21  
22 **Word count:** 3963  
23

24  
25  
26 **Keywords:** cigarette, smoker, nasopharyngeal carcinoma, risk factor, meta-analysis  
27

28  
29  
30 **Corresponding author:**  
31

32 Zhenming Fu, M.D., Ph.D., Mphil  
33

34  
35 Department of Radiation and Medical Oncology, Zhongnan Hospital of Wuhan  
36  
37 University  
38

39  
40 No. 169 Donghu Road, Wuchang District, Wuhan 430071, Hubei, P. R. China  
41

42 Email: davidfuzming@163.com  
43

44  
45 Telephone: +86 189 8619 9927  
46

47  
48  
49 ***Professor Fu's current available address:***  
50

51  
52 Cancer Center, Renmin Hospital of Wuhan University  
53

54  
55 No. 238 Jiefang Road, Wuchang District, Wuhan 430060, Hubei, P. R. China  
56

## Abstract

**Objective** The role of cigarette smoking as an independent risk factor for patients with nasopharyngeal carcinoma (NPC) is controversial. We attempted to provide evidence of a reliable association between cigarette smoking and the risk of NPC.

**Design** Meta-analysis.

**Data sources** PubMed online and the Cochrane Library of relevant studies published up to February 2016.

**Eligibility criteria** All studies had to evaluate the relationship between NPC and cigarette smoking with never smokers as the reference group.

**Outcomes** The primary outcome was the adjusted OR, RR or HR of NPC patients comparing smoking with never-smoking; the second was the crude OR, RR or HR.

**Results** We identified 17 case-control studies and four cohort studies including 5960 NPC cases and 429464 subjects. Compared with never smokers, current smokers and ever smokers had a 59% and a 56% greater risk of NPC respectively. A dose-response relation was identified in that the risk estimate rose by 15% ( $P<0.001$ ) with every additional 10 pack-years of smoking, and risk increased with intensity of cigarette smoking ( $>30$  cigarettes per day). Significantly increased risk was only found among male smokers (Odds Ratio (OR), 1.36; 95% confidence interval (CI), 1.15-1.60), not among female smokers (OR, 1.58; 95% CI, 0.99-2.53). Significantly increased risk also existed in the differentiated (OR, 2.34; 95% CI, 1.77-3.09) and the undifferentiated type of NPC (OR, 1.15; 95% CI, 0.90-1.46). Moreover, people started smoking at younger age ( $<18$ y) had a greater risk than those starting later for developing NPC (OR, 1.78; 95% CI, 1.41-2.25).

**Conclusions** Cigarette smoking was associated with increased risk of NPC, especially for young smokers. However, we did not find statistical significant risks of NPC in females and in undifferentiated type, which might warrant further researches.

**Strengths and limitations of this study**

- Major strengths of our meta-analysis comprise new published studies being included, strict selection criteria, careful literature search, data extraction and analyses by two authors separately.
- The main limitations of our meta-analysis are study design, characteristics and size of study population, different outcome and variables used in eligible studies.

## Introduction

There were approximately 86,691 incident cases of NPC and 50,831 NPC-related deaths in 2012 worldwide [1]. Despite NPC being rare in developed countries, the overall incidence rate in Southeastern Asia is 6.5/100,000 person-years among males and 2.6/100,000 person-years among females [2]. Particularly, an age-standardized incidence rate of 20-50 per 100,000 males in south China presented a remarkably high incidence compared to that among white populations [3].

Cigarette smoking has been regarded as a risk factor for the occurrence of a wide variety of malignancies, including respiratory tract, gastrointestinal and urogenital systems [4, 5]. Over the decades, some reports have suggested that cigarette smoking is associated with NPC risk [6]. However, the association has not been consistently demonstrated, some studies failing to find such a positive association [7-10]. The discrepancies of inconsistent outcome might be owing to variations in study population, methodology, definitions of cigarette smoking and so on. Furthermore, inevitable recall bias and confounding in case-control studies might further complicate the scenario [11, 12].

One recent meta-analysis of 28 case-control studies and 4 cohort studies reported the adverse effect of cigarette smoking on the incidence of NPC [13]. The pooled analysis showed that ever smokers had a 60% greater risk of developing the disease than never smokers. And there was a significant dose-dependent association. However, between-study heterogeneity was strikingly high across the overall analysis and still remained after stratified analyses. Specifically, some included studies might not be appropriate to be combined for synthetic analysis because of their inadequate reports about association between cigarette smoking and NPC risk [14-17], unclear definition of cigarette smoking and health condition of controls [18, 19], controls with a history of cancer [20], and inappropriate reference group [21, 22]. These might result in overestimating or underestimating the association of cigarette smoking on NPC risk, and thus the conclusions might be hard to interpret. In addition, new studies have been published recently which warrant an up-to-date analysis [23-26].

In this meta-analysis, we sought to provide a summary of available literature to



1  
2  
3 examine the association between cigarette smoking and the risk of NPC, we also  
4 assessed the gender and histological type differences in effects of cigarette smoking  
5 on the NPC risk.  
6  
7

## 8 **Methods**

### 9 *Literature search*

10  
11 This meta-analysis was performed on the basis of the Meta-analysis Of  
12 Observational Studies in Epidemiology (MOOSE) [27]. To identify all relevant  
13 publications on NPC and cigarette smoking, firstly, we used the engine “Windows  
14 Internet Explorer 10.0” to search the PubMed and Cochrane Library databases with  
15 terms “(((nasopharyngeal carcinoma OR nasopharyngeal cancer OR cancer of  
16 nasopharynx)) AND (smoking OR cigarette OR tobacco OR nicotine)) AND (etiology  
17 OR epidemiology OR environment OR risk factor) AND (Humans [Mesh])”, then we  
18 scrutinized the references of articles obtained from the database search for additional  
19 studies. Only publications in English were included.  
20  
21  
22  
23  
24  
25  
26  
27  
28

### 29 *Selection criteria*

30  
31 The following criteria were applied for literature selection: (1) the study was  
32 case-control or cohort design; (2) controls were cancer-free; (3) cases were patients  
33 who were histopathologically confirmed NPC and had no other malignances; (4) the  
34 study evaluated the relationship between NPC and one of various aspects of cigarette  
35 smoking, including cigarette smoking status, smoking intensity, cumulative amount of  
36 cigarette smoking, age at onset and duration of smoking; (5) studies used never  
37 smokers as the reference group; (6) studies provided enough information to estimate  
38 the odds ratios (ORs) or the relative risk (RR) or hazard ratios (HRs) with 95%  
39 confidence interval (CI) for cigarette smoking variable. If multiple articles were on  
40 the same study population, the one with adequate information or most related or  
41 largest sample size was finally selected; furthermore, when there were separate data  
42 for gender or histologic type of NPC in one study, they were considered for additional  
43 subgroup analysis.  
44  
45  
46  
47  
48  
49  
50  
51  
52  
53  
54

### 55 *Data extraction*

56  
57 The following data were extracted from eligible studies: first author, publication  
58  
59

1  
2  
3 year, study region, study design, sample size, control source, age of participants  
4 (range, mean), gender distribution, categories of smoking (status, intensity, pack-years,  
5 age at onset of smoking, et al.), method of questionnaire survey, duration of follow-up,  
6 end-point (for cohort study), covariates for adjustment, OR, RR or HR with their 95%  
7 CIs for each category of smoking exposure. In case the above effect sizes were not  
8 available, crude effect estimates and 95% CIs were calculated by provided number of  
9 subjects. All data were independently extracted and analyzed by two investigators;  
10 any inconsistency was resolved by consensus.  
11  
12  
13  
14  
15  
16  
17

### 18 *Quality assessment*

19  
20 The qualities of eligible studies were assessed by using the Newcastle-Ottawa  
21 Scale (NOS) [28], which comprised three parts assigned with a maximum of 9 points:  
22 selection, comparability, exposures and outcome condition. Two investigators  
23 evaluated all eligible publications separately and discrepancies were resolved by  
24 discussion.  
25  
26  
27  
28

### 29 *Data integration*

30  
31 Not all studies included in this meta-analysis provided consistent information  
32 about cigarette smoking, so we stipulated smoking status as follows: never smokers  
33 (people that did not smoke any tobacco product), ever smokers, current smokers and  
34 former smokers. With regard to smoking quantity, we combined data extracted from  
35 all eligible publications into new categories: subjects with cigarettes consumption of  
36 <30 pack-years were assigned to light smokers, while those who consumed  $\geq 30$   
37 pack-years were designated to heavy smokers. Similarly, for age at smoking onset,  
38 early group meant that subjects began smoking at <18 years old while later group  
39 defined as smoking at  $\geq 18$  years old. We also defined that regions with NPC incidence  
40 less than 1 per 100,000 person-years was low incidence rate group, 1-10 per 100,000  
41 person-years was intermediate incidence rate group and greater than 10 per 100,000  
42 was high incidence rate group.  
43  
44  
45  
46  
47  
48  
49  
50  
51  
52  
53

### 54 *Statistical analysis*

55  
56 Since NPC is considered as a relatively rare outcome, relative risk and odds ratio  
57 were not differentiated, the odds ratios were used as effect size for all studies. We  
58  
59  
60

1  
2  
3 conducted fixed and random effects meta-analyses and the synthetic estimates did not  
4 differ substantially between the two models. Therefore, random-effects (Der  
5 Simonian-Laird) model [29], generally regarded as the more conservative method,  
6 was applied to calculate point estimates for all analyses. Heterogeneity among articles  
7 was estimated by using the  $I^2$  statistic and  $p$  value associated with  $Q$  statistics [30].  
8  
9

10  
11 We conducted dose-response meta-analyses using the generalized least-squares  
12 method for trend estimation of summary dose-response data, as described by  
13 Greenland and Longnecker [31]. For non-linearity relationship, restricted cubic  
14 splines with four knots at percentiles 5%, 35%, 65% and 95% of the distribution were  
15 created and  $P$  value for non-linearity was computed by testing the null hypothesis that  
16 the coefficient of the second and the third splines were equal to zero [32].  
17  
18  
19  
20  
21  
22  
23

24 To assess the robustness of our findings and the source of heterogeneity,  
25 meta-regression methods and stratified analyses were performed according to study  
26 design, incidence rate of regions, adjustment, score of eligible studies, categories of  
27 cigarette smoking, gender and NPC histological type (the latter three were only  
28 evaluated in stratified analysis). Sensitivity analysis was also conducted by deleting  
29 each study in turn to reflect the influence of every single study to the overall estimate.  
30 In addition, we evaluated the publication bias in the pooled analysis by Egger's test  
31 and the trim-and-fill method [33]. All statistical analyses were performed with Stata  
32 SE 12.0 software, and  $p$  value  $<0.05$  (two sides) was considered statistically  
33 significant.  
34  
35  
36  
37  
38  
39  
40  
41  
42

#### 43 *Patient involvement*

44 No patients were involved in this study.  
45

## 46 **Results**

### 47 *Study characteristics*

48 **Figure 1** shows the flow chart describing the sequential selection procedures of  
49 eligible studies. A total of 342 articles were identified, of which 302 articles were  
50 deemed irrelevant after reviewing the titles and abstracts. Subsequently, 40 articles  
51 were further scanned by full-text. Meanwhile, by searching all references of relevant  
52 articles, three additional articles were considered as potentially eligible. Among them  
53  
54  
55  
56  
57  
58  
59  
60

1  
2  
3  
4  
5  
6  
7  
8  
9  
10  
11  
12  
13  
14  
15  
16  
17  
18  
19  
20  
21  
22  
23  
24  
25  
26  
27  
28  
29  
30  
31  
32  
33  
34  
35  
36  
37  
38  
39  
40  
41  
42  
43  
44  
45  
46  
47  
48  
49  
50  
51  
52  
53  
54  
55  
56  
57  
58  
59  
60

22 were excluded because of following reasons: five studies with inadequate information for data extraction, four studies without report of the association between cigarette smoking and NPC risk, four studies with overlapped data, four studies did not designate never smokers as reference group, two studies included improper controls (for example, controls with malignancies or without description of health conditions), one without clear definition of cigarette smoking, one systematic review and one meta-analysis. Finally, 21 articles were eligible for qualitative synthesis, including seventeen case-control studies (5673 cases and 8653 controls) and four cohort studies (287 cases and 420,811 participants).

All of the studies in the overall analysis were published between 1985 and 2015. Of these included studies, not all studies reported the estimates for all risk estimates. Nineteen studies reported on ever smoking [7-10, 23, 25, 26, 34-45], ten on former smoking [7-9, 23, 26, 38, 39, 41, 46], eleven on current smoking [7-10, 23, 24, 26, 38, 39, 41, 46], ten on pack-years of smoking [7, 23, 24, 26, 35, 37-39, 41, 43] and six on age at onset of smoking [7, 9, 10, 23, 26, 46]. Additionally, five studies provided separate data of gender [35, 38, 41-43] and five studies reported the risk of NPC histological type associated with cigarette smoking [9, 38, 39, 42, 44]. As regarding to geographic region, eight studies were conducted in China [7, 8, 24, 26, 37, 41, 43, 44], five in the US [34, 35, 38, 39, 46], five in Southeast Asia region [10, 23, 25, 36, 40], two in Europe [9, 45] and one in Africa [42]. The summarized characteristics of the 21 studies are presented in **Tables I and II**.

#### *Association between cigarette smoking status and NPC*

The pooled analysis of nineteen studies revealed a modest but significant increased risk of NPC among ever smokers against never smokers (OR, 1.56; 95% CI, 1.32-1.83). Heterogeneity was obviously observed across the studies ( $I^2=66.8\%$ ,  $P<0.01$ ). The pooled estimate for case-control studies was 1.61 (95% CI, 1.36-1.91; heterogeneity:  $I^2=65.8\%$ ,  $P<0.01$ ), whereas cohort studies presented a null association (OR, 1.11; 95% CI, 0.84-1.48; heterogeneity:  $I^2=0.0\%$ ,  $P=0.83$ ) (**Figure 2**).

Similarly, eleven studies identified for the comparison of current smokers with NPC risk demonstrated positive result (OR, 1.59; 95% CI, 1.35-1.89; heterogeneity:

1  
2  
3  
4  
5  
6  
7  
8  
9  
10  
11  
12  
13  
14  
15  
16  
17  
18  
19  
20  
21  
22  
23  
24  
25  
26  
27  
28  
29  
30  
31  
32  
33  
34  
35  
36  
37  
38  
39  
40  
41  
42  
43  
44  
45  
46  
47  
48  
49  
50  
51  
52  
53  
54  
55  
56  
57  
58  
59  
60

$I^2=32.5\%$ ,  $P=0.14$ ). When analyzed by study design, the risk estimates were both statistically significant for case-control and cohort studies. The pooled ORs were 1.67 (95% CI, 1.06-2.61; heterogeneity:  $I^2=22.6\%$ ,  $P=0.25$ ) and 2.19 (95% CI: 1.02-4.72; heterogeneity:  $I^2=65.0\%$ ,  $P=0.06$ ), respectively (**Table III**).

When compared with never smokers, former smokers from ten studies exhibited an increased risk of NPC (OR, 1.36; 95% CI, 1.15-1.61; heterogeneity:  $I^2=2.3\%$ ,  $P=0.42$ ). However, stratified analysis presented a void association in cohort studies (OR, 0.87; 95% CI, 0.54-1.41; heterogeneity:  $I^2=0.0\%$ ,  $P=0.37$ ) but a significant association in case-control studies (OR, 1.45; 95% CI, 1.21-1.73; heterogeneity:  $I^2=0.0\%$ ,  $P=0.70$ ) (**Table III**).

As for age at cigarette smoking onset, six studies reported the association with NPC risk. The pooled analysis revealed that early group (smoking at <18 years old) had significantly increased risk of NPC (OR, 1.78; 95% CI, 1.41-2.25; heterogeneity:  $I^2=0.0\%$ ,  $P=0.94$ ), whereas later group (smoking at  $\geq 18$  years old) had slightly increased risk of NPC (OR, 1.28; 95% CI, 1.00-1.64; heterogeneity:  $I^2=0.0\%$ ,  $P=0.86$ ) (**Table III**).

#### *Dose-response analysis*

For the cumulative amount of cigarette smoking, no between-study heterogeneity was found ( $I^2=0.0\%$ ,  $P>0.05$ ) with a pooled OR of 1.34 (95% CI, 1.13-1.58) for light smokers and 2.03 (95% CI, 1.57-2.61) for heavy smokers, respectively (**Table III**). The dose-response analysis showed statistical linear relationship between the number of pack-years and NPC risk ( $P_{\text{for linearity}}=0.83$ ) (**Figure 3**). Smokers had a 15% (OR, 1.15; 95% CI, 1.11-1.19,  $P<0.001$ ) increasing risk of NPC for every additional 10 pack-years smoked in comparison with never smokers (data not shown). When comparing the NPC risk for intensity of cigarettes smoked per day with never smokers, the non-linear dose-response relationship indicated that smokers with high exposure (>30 cigarettes/day) other than with low exposure have higher risk estimate, which presented an upward tendency in steeply rising trend ( $P_{\text{for non-linearity}}<0.05$ ) (**Figure 4**).

#### *Stratified analysis*

When conducted stratified analysis by regions with different incidence rate, there

1  
2  
3 were nineteen studies compared NPC risk for ever smokers with that for never  
4 smokers. Among them, five studies carried out in regions with low NPC incidence  
5 rate yielded the highest risk (OR, 1.68; 95% CI, 1.36-2.07; heterogeneity:  $I^2=0.0\%$ ,  
6  $P=0.84$ ). The pooled estimates were 1.59 (95% CI, 1.21-2.09; heterogeneity:  
7  $I^2=78.8\%$ ,  $P<0.01$ ) for regions (ten studies) with intermediate NPC incidence rate and  
8 1.27 (95% CI, 1.05-1.53; heterogeneity:  $I^2=0.0\%$ ,  $P=0.52$ ) for regions (4 studies) with  
9 high incidence rate, respectively (**Table III**).

10  
11 We also performed stratified analysis by status of adjustment for confounding  
12 variables. Thirteen studies provided adjusted ORs for pooled analysis. But six studies  
13 either reported unadjusted ORs or reported the number of cases and controls which  
14 could be used to calculate the odds ratios. The estimates for the association of  
15 cigarette smoking and NPC risk in adjusted group (OR, 1.55; 95% CI, 1.26-1.91;  
16 heterogeneity:  $I^2=75.3\%$ ,  $P<0.01$ ) and in unadjusted group (OR, 1.57, 95% CI,  
17 1.27-1.93; heterogeneity:  $I^2=0.0\%$ ,  $P=0.68$ ) were similar (**Table III**).

18  
19 When the meta-regression analyses were applied to assess the sources of  
20 heterogeneity and their impacts on the NPC risk, we found that the publication year,  
21 study design, regions of different incidence rate and quality of studies were not  
22 significant sources of heterogeneity ( $P=0.55$ , data not shown).

#### 23 24 25 *Association between cigarette smoking and histological type of NPC*

26  
27 Specifically, the effects of cigarette smoking on NPC histological types were  
28 different. We found that significant association was only noted for differentiated  
29 squamous-cell NPC (OR, 2.34; 95% CI, 1.77-3.09; heterogeneity:  $I^2=0.0\%$ ,  $P=0.72$ ).  
30 Contrarily, the risk estimate for undifferentiated carcinoma of NPC in smokers was  
31 statistically insignificant though the odds ratio was 1.15 (95% CI, 0.90-1.46;  
32 heterogeneity:  $I^2=0.0\%$ ,  $P=0.02$ ) (**Table III**).

#### 33 34 35 *Association between cigarette smoking of gender and NPC*

36  
37 Seven studies addressed the association between cigarette smoking and NPC risk  
38 by gender, including five in males and two in females. Compared with never smokers,  
39 increased risk for male smokers was noted (OR, 1.36; 95% CI, 1.15-1.60). However,  
40 an insignificant association (OR, 1.58; 95% CI, 0.99-2.53) was observed for female  
41  
42  
43  
44  
45  
46  
47  
48  
49  
50  
51  
52  
53  
54  
55  
56  
57  
58  
59  
60

1  
2  
3 smokers (**Table III**).

4  
5 *Sensitivity analysis and publication bias*

6  
7 Sensitivity analysis revealed that Ji 2011 study [42] was the source of statistical  
8 heterogeneity in the pooled analysis for ever smokers. When this outlier study was  
9 removed, between-study heterogeneity dropped strikingly to 27.3% in the remaining  
10 studies, whereas the odds ratios (OR, 1.47; 95% CI, 1.31-1.66) changed moderately  
11 but remained significant. As for case-control studies, the OR changed from 1.61 (95%  
12 CI: 1.36-1.91) to 1.52 (95% CI: 1.35-1.72) with heterogeneity fallen from 65.8% to  
13 23.5% (**Figure 5**). The findings were further verified in the intermediated incidence  
14 rate group (OR, 1.49, 95% CI, 1.21-1.82; heterogeneity:  $I^2=49.6\%$ ,  $P=0.04$ ) and in the  
15 adjusted group (OR, 1.45; 95% CI, 1.25-1.69; heterogeneity:  $I^2=41.8\%$ ,  $P=0.05$ ) (data  
16 not shown). However, the heterogeneity reduced partly when the study of Turkoz  
17 2001 was removed (OR, 1.50; 95% CI, 1.28-1.76; heterogeneity:  $I^2=62.4\%$ ,  $P<0.01$ )  
18 (data not shown).  
19

20  
21 Publication bias was evaluated by Egger's test and Trim-and-Fill method. Except  
22 for subgroup analyses with ever smokers and heavy smokers, no prominently  
23 significant publication bias (with  $P>0.05$  in Egger's test) was observed in our  
24 meta-analysis. After adjusted for publication bias, the risk of NPC remained stable  
25 with an OR of 1.56 (95% CI, 1.32-1.84) for ever smokers, but changed slightly (OR,  
26 1.80, 95% CI, 1.37-2.36) for heavy smokers (**Table III**).  
27

28  
29 **Discussion**

30  
31 The results from this meta-analysis, based on seventeen case-control studies and  
32 four cohort studies, supported that there was moderate association between cigarette  
33 smoking and nasopharyngeal carcinoma risk, which was consistent with the result of  
34 previous meta-analysis [13].  
35

36  
37 *Interpretation*

38  
39 The pooled risk estimate for cohort studies comparing ever smokers to never  
40 smokers was not statistically significant. When conducted similar stratified analyses  
41 for current smokers and former smokers, we found that current smoking was  
42 significantly related to the risk of NPC while former smoking had an insignificant  
43  
44  
45  
46  
47  
48  
49  
50  
51  
52  
53  
54  
55  
56  
57  
58  
59  
60

1  
2  
3  
4  
5  
6  
7  
8  
9  
10  
11  
12  
13  
14  
15  
16  
17  
18  
19  
20  
21  
22  
23  
24  
25  
26  
27  
28  
29  
30  
31  
32  
33  
34  
35  
36  
37  
38  
39  
40  
41  
42  
43  
44  
45  
46  
47  
48  
49  
50  
51  
52  
53  
54  
55  
56  
57  
58  
59  
60

association with NPC risk. Considering the findings of stratified analyses, it might be the result from former smoking that contributed to the discrepancy between pooled analysis for cohort studies and overall analysis. In addition, this meta-analysis demonstrated relatively high heterogeneity both for the overall analysis and subgroup analyses. When the Ji 2011 study [44] was removed from the synthetic analysis, heterogeneity was strikingly reduced in stratified analysis by study design and regions with different NPC incidence rate. Furthermore, the meta-regression analyses indicated that heterogeneity did not prominently result from publication year, study design, regions of different incident rate and quality of studies. To our knowledge, multiple lines of epidemiological studies had found that the development of NPC could be influenced by varieties of etiologies including Epstein-Barr virus (EBV), genetic components and other environmental factors, like preserved food, socioeconomic status, occupation, so on and so forth [6, 47-50]. Therefore, it might be its inappropriate subjects that contributed to selection bias which resulted in the high heterogeneity in the Ji 2011 study, though it had a large sample size with risk estimates adjusted by age, gender, alcohol intake and family history.

One large cohort study [10], conducted in high-incidence region and comprised the majority of undifferentiated NPC (nearly 90% cases), did not reported statistically increased risk of NPC among current smokers compared with never smokers. The difference in the effect of current smoking on NPC risk may be due to its histological type of NPC because undifferentiated carcinoma in high-risk areas seemed more strongly related to Epstein-Barr virus infection other than cigarette smoking [48]. Meanwhile, some case-control studies with small sample size of current smokers also had null results [7-9, 38, 39], of which two studies pointed out that significantly higher risk only existed for smokers with considerable levels of cigarette smoking (>20 cigarettes/day or >30 pack-years) [38, 39]. Nonetheless, the result of our integrated analysis for current smokers versus never smokers was generally consistent with that of the previous meta-analyses [13].

For former smokers, the less consistent risk estimates might result from small number of studies with adequate sample size. The estimates for former smokers in



1  
2  
3 eight studies [7-10, 26, 39, 41, 46] presented null association on NPC risk which was  
4 parallel to the results of stratified analysis by study design, and only two studies [23,  
5 38] demonstrated statistically positive results. The discrepancies in the effects of  
6 former cigarette smoking on NPC risk might arise from the following aspects: the  
7 group of former smokers may have included people who had quit for a long time, and  
8 thus their risk might diminish or even reach the level of never smokers; the minimum  
9 period of time since quitting smoking in former smokers varied by study, which could  
10 result in judgement bias on the interviewed subjects in some studies.  
11  
12

13  
14  
15  
16  
17  
18 This meta-analysis revealed that there was a clear dose-response relationship  
19 between cigarette smoking and the risk of NPC. That is, the more cigarette smoking  
20 (intensity of cigarettes smoked per day and the amount of pack-years), the higher risk  
21 for the development of NPC. Note that similar results have been widely observed for  
22 pancreatic cancer, liver cancer, renal carcinoma and gallbladder disease [51-54]. The  
23 exact explanation of this dose-dependent effect remains vague, it could be  
24 hypothesized that the more cigarette smoking, the greater impact on the epithelial  
25 cells of nasopharynx. Therefore, the risk of NPC would be higher in those who  
26 smoked more cigarettes. The actual mechanism about the relationship of the amount  
27 of smoking and NPC risk had been searched by molecular studies [55, 56], which  
28 pointed out that smoking is a factor for tumor growth and acts as a mutagen and DNA  
29 damaging agent that drives tumor initiation in normal epithelial cells of nasopharynx.  
30  
31  
32  
33  
34  
35  
36  
37  
38  
39  
40

41 In this analysis, a statistically significant effect of smoking on NPC risk was  
42 observed in males but not in females. The gender difference in response to smoking  
43 might be related to interaction between protective endogenous or exogenous estrogens  
44 among women compared with men [57], and could also be explained by maturity of  
45 smoking trends among males and but not among females. Men might exposure to  
46 smoking for a longer duration as compared to women (34% of the male vs. 11% of the  
47 female had started smoking before the age of 15 years) [58]. However, the result of  
48 female ever smokers might not be adequately stable because only two studies reported  
49 the association between cigarette smoking and the risk of NPC for females [35, 41].  
50  
51  
52  
53  
54  
55  
56  
57

58 Additionally, we found that the younger age people began to smoke, the higher  
59

1  
2  
3  
4  
5  
6  
7  
8  
9  
10  
11  
12  
13  
14  
15  
16  
17  
18  
19  
20  
21  
22  
23  
24  
25  
26  
27  
28  
29  
30  
31  
32  
33  
34  
35  
36  
37  
38  
39  
40  
41  
42  
43  
44  
45  
46  
47  
48  
49  
50  
51  
52  
53  
54  
55  
56  
57  
58  
59  
60

risk they developed NPC. Our results showed that the pooled ORs were 1.78 (95% CI, 1.41-2.25) for smokers in early group and 1.28 (95% CI, 1.00-1.64) in later group, respectively. Interestingly, the findings of previous meta-analysis appeared totally opposite with ORs of 1.17 (95% CI, 0.78-1.75) for early group and 1.58 (95% CI, 1.10-2.26) for later group [13]. Like many other cancers, NPC may take decades to develop from premalignant cells to detectable solid tumor. Thus, the exposure to carcinogenic agents early in life could have substantial impacts on the development of NPC [6, 59]. Moreover, the incidence of NPC peaks at age of 50-59 years in high-risk regions, while in western countries, the incidence of NPC peaks somewhat later ( $\geq 65$ -year-olds) [59]. As a result, the number of NPC patients in terms of age distribution could considerably vary in our eligible studies that were conducted in different countries.

When stratified by histological type of NPC, the pooled analysis presented a higher risk of differentiated NPC than that of undifferentiated NPC, and the later had an insignificant risk estimate. This difference might be owing to fewer studies included in the pooled analysis for undifferentiated NPC because we excluded those ineligible studies either for no report of the association between cigarette smoking and NPC risk [16] or for overlapped data [60]. It might avoid incorrect estimation of smoking effects on NPC risk. Moreover, we found that the risk estimates adversely associated with the NPC incidence rate. For example, the pooled OR for high incidence rate areas to low incidence rate areas ranged from 1.27 to 1.68. This might suggest there are substantial heterogeneity between NPC risk and smoking by histological types and geographic variations. Undifferentiated carcinoma of the nasopharynx is the predominant type in high-risk areas, and it is consistently associated with EBV infection, which may increase the carcinogenic effect of cigarette smoking [48].

### ***Generalizability***

The magnitude of association between cigarette smoking and the NPC risk was not as big as those for other smoking-related cancers like lung cancer and gastrointestinal malignancies [4]. However, NPC was quite epidemic in southeastern

1  
2  
3 Asia especially in cities in southern China, and China was one of the largest tobacco  
4 producing and consuming countries in the world [61]. Besides, we found current  
5 smokers are more related to the development of NPC with a higher risk estimate as  
6 compared to former smokers. These emphasized the importance and urgency of  
7 efforts to initiate the control of cigarette smoking to improve public health. Any  
8 efficient tobacco control programs would be helpful to reduce morbidity and mortality  
9 of smoking-related cancers worldwide.

### 16 **Limitations**

17  
18 The results of this meta-analysis should be explicated in the context of several  
19 limitations. For example, the design of included studies varied in source of subjects  
20 recruited, standardization for categories of cigarette smoking, ambiguous definition of  
21 tobacco products and adjusted factors. Additionally, our meta-analysis was a mix of  
22 retrospective studies and prospective studies, and was lack of individual participant  
23 data for adjustment of potential confounders. Generally, Epstein-Barr virus infection  
24 was thought to be highly related to NPC risk [62]. However, a 22-year follow-up  
25 study carried out by Hsu et al. revealed that Epstein-Barr virus was less likely to  
26 modify the estimate for smoking associated with NPC risk [43]. And the links of other  
27 risk factors like dietary and social practices were often inconsistent between studies  
28 [62]. Moreover, the risk estimates of NPC resembled both in the group with adjusted  
29 odds ratio and in the group with unadjusted odds ratio in our meta-analysis.

### 41 **Conclusions**

42  
43 This meta-analysis demonstrated that cigarette smoking associated with a modest,  
44 but statistically significant increased risk of NPC. Yet, further prospective studies are  
45 needed to elucidate the NPC risk in terms of gender, histological type, and for former  
46 smokers and smoking onset age.  
47  
48  
49  
50  
51  
52  
53  
54  
55  
56  
57  
58  
59  
60

1  
2  
3  
4  
5  
6  
7  
8  
9  
10  
11  
12  
**Contributor ship statement:** LMJ (Mengjuan Long) and LP (Ping Li) did the literate research and selected the eligible articles separately; LP (Ping Li) and NZH (Zihua Nie) extracted the whole data and assessed the quality of our selected articles; LMJ integrated and analyzed data, and wrote the manuscript. FZM (Zhenming Fu) examined and revised the manuscript. All authors read and approved the final manuscript.

13  
14  
15  
**Funding:** This study was partially supported by grants 81472971 from the National Natural Science Foundation of China.

16  
17  
**Competing interests:** The authors declare no potential conflicts of interest.

18  
19  
**Data sharing statement:** No additional data are available.

## References

1. Ferlay J SI, et al. Cancer Incidence and Mortality Worldwide: IARC Cancer Base. *GLOBOCAN 2012 v1.0*.
2. Curado MP EB, et al. Cancer incidence in five continents. *Geneva: WHO Press 2007 vol. IX.*
3. Jemal A, Bray F, Center MM et al. Global cancer statistics. *CA Cancer J Clin 2011*; 1: 69-90.
4. Sasco AJ, Secretan MB, Straif K. Tobacco smoking and cancer: a brief review of recent epidemiological evidence. *Lung Cancer 2004*; 45 Suppl 2: S3-9.
5. Sandler RS, Sandler DP, Comstock GW et al. Cigarette smoking and the risk of colorectal cancer in women. *J Natl Cancer Inst 1988*; 80: 1329-1333.
6. Jia WH, Qin HD. Non-viral environmental risk factors for nasopharyngeal carcinoma: a systematic review. *Semin Cancer Biol 2012*; 22: 117-126.
7. Cheng YJ, Hildesheim A, Hsu MM et al. Cigarette smoking, alcohol consumption and risk of nasopharyngeal carcinoma in Taiwan. *Cancer Causes Control 1999*; 10: 201-207.
8. Zou J, Sun Q, Akiba S et al. A case-control study of nasopharyngeal carcinoma in the high background radiation areas of Yangjiang, China. *J Radiat Res 2000*; 41 Suppl: 53-62.
9. Polesel J, Franceschi S, Talamini R et al. Tobacco smoking, alcohol drinking, and the risk of different histological types of nasopharyngeal cancer in a low-risk population. *Oral Oncol 2011*; 47: 541-545.
10. Friberg JT, Yuan JM, Wang R et al. A prospective study of tobacco and alcohol use as risk factors for pharyngeal carcinomas in Singapore Chinese. *Cancer 2007*; 109: 1183-1191.
11. Grimes DA, Schulz KF. Bias and causal associations in observational research. *Lancet 2002*; 359: 248-252.
12. Weinberg CR. Toward a clearer definition of confounding. *Am J Epidemiol 1993*; 137: 1-8.
13. Xue WQ, Qin HD, Ruan HL et al. Quantitative association of tobacco smoking with the risk of nasopharyngeal carcinoma: a comprehensive meta-analysis of studies conducted between 1979 and 2011. *Am J Epidemiol 2013*; 178: 325-338.
14. Lin TM, Yang CS, Tu SM et al. Interaction of factors associated with cancer of the nasopharynx. *Cancer 1979*; 44: 1419-1423.
15. Chen CJ, Liang KY, Chang YS et al. Multiple risk factors of nasopharyngeal carcinoma: Epstein-Barr virus, malarial infection, cigarette smoking and familial tendency. *Anticancer Res 1990*; 10: 547-553.
16. Nesic V, Sipetic S, Vlajinac H et al. Risk factors for the occurrence of undifferentiated carcinoma of nasopharyngeal type: a case-control study. *Srp Arh Celok Lek 2010*; 138: 6-10.
17. Ren ZF, Liu WS, Qin HD et al. Effect of family history of cancers and environmental factors on risk of nasopharyngeal carcinoma in Guangdong, China. *Cancer Epidemiol 2010*; 34: 419-424.
18. Armstrong RW, Armstrong MJ, Yu MC, Henderson BE. Salted fish and inhalants as risk factors for nasopharyngeal carcinoma in Malaysian Chinese. *Cancer Res 1983*; 43: 2967-2970.
19. West S, Hildesheim A, Dosemeci M. Non-viral risk factors for nasopharyngeal carcinoma in the Philippines: results from a case-control study. *Int J Cancer 1993*; 55: 722-727.
20. Ng TP. A case-referent study of cancer of the nasal cavity and sinuses in Hong Kong. *Int J Epidemiol 1986*; 15: 171-175.
21. Guo X, Johnson RC, Deng H et al. Evaluation of nonviral risk factors for nasopharyngeal carcinoma in a high-risk population of Southern China. *Int J Cancer 2009*; 124: 2942-2947.
22. Ma F, Zhang H, Zhai Y et al. Functional polymorphism -31C/G in the promoter of BIRC5 gene

- and risk of nasopharyngeal carcinoma among chinese. *PLoS One* 2011; 6: e16748.
23. Fachiroh J, Sangrajrang S, Johansson M et al. Tobacco consumption and genetic susceptibility to nasopharyngeal carcinoma (NPC) in Thailand. *Cancer Causes Control* 2012; 23: 1995-2002.
24. Lin JH, Jiang CQ, Ho SY et al. Smoking and nasopharyngeal carcinoma mortality: a cohort study of 101,823 adults in Guangzhou, China. *BMC Cancer* 2015; 15: 906.
25. Lye MS, Visuvanathan S, Chong PP et al. Homozygous Wildtype of XPD K751Q Polymorphism Is Associated with Increased Risk of Nasopharyngeal Carcinoma in Malaysian Population. *PLoS One* 2015; 10: e0130530.
26. Xie SH, Yu IT, Tse LA et al. Tobacco smoking, family history, and the risk of nasopharyngeal carcinoma: a case-referent study in Hong Kong Chinese. *Cancer Causes Control* 2015; 26: 913-921.
27. Stroup DF, Berlin JA, Morton SC et al. Meta-analysis of observational studies in epidemiology: a proposal for reporting. Meta-analysis Of Observational Studies in Epidemiology (MOOSE) group. *Jama* 2000; 283: 2008-2012.
28. Wells G Sbea. The Newcastle-Ottawa Scale (NOS) for assessing the quality of nonrandomized studies in meta-analyses. Ottawa, Ontario, Canada: *Ottawa Health Research Institute* 2000.
29. DerSimonian R, Laird N. Meta-analysis in clinical trials. *Control Clin Trials* 1986; 7: 177-188.
30. Higgins JP, Thompson SG. Quantifying heterogeneity in a meta-analysis. *Stat Med* 2002; 21: 1539-1558.
31. Greenland S, Longnecker MP. Methods for trend estimation from summarized dose-response data, with applications to meta-analysis. *Am J Epidemiol* 1992; 135: 1301-1309.
32. Orsini N GS, et al. A procedure to tabulate and plot results after flexible modeling of a quantitative covariate. *Stata J* 2011; 11: 29.
33. Egger M, Davey Smith G, Schneider M, Minder C: Bias in meta-analysis detected by a simple, graphical test. *Bmj* 315: 629-634, 1997.
34. Mabuchi K, Bross DS, Kessler, II. Cigarette smoking and nasopharyngeal carcinoma. *Cancer* 1985; 55: 2874-2876.
35. Nam JM, McLaughlin JK, Blot WJ. Cigarette smoking, alcohol, and nasopharyngeal carcinoma: a case-control study among U.S. whites. *J Natl Cancer Inst* 1992; 84: 619-622.
36. Sriamporn S, Vatanasapt V, Pisani P et al. Environmental risk factors for nasopharyngeal carcinoma: a case-control study in northeastern Thailand. *Cancer Epidemiol Biomarkers Prev* 1992; 1: 345-348.
37. Yu MC, Garabrant DH, Huang TB, Henderson BE. Occupational and other non-dietary risk factors for nasopharyngeal carcinoma in Guangzhou, China. *Int J Cancer* 1990; 45: 1033-1039.
38. Zhu K, Levine RS, Brann EA et al. A population-based case-control study of the relationship between cigarette smoking and nasopharyngeal cancer (United States). *Cancer Causes Control* 1995; 6: 507-512.
39. Vaughan TL, Shapiro JA, Burt RD et al. Nasopharyngeal cancer in a low-risk population: defining risk factors by histological type. *Cancer Epidemiol Biomarkers Prev* 1996; 5: 587-593.
40. Challeng PK, Narain K, Das HK et al. Risk factors for cancer nasopharynx: a case-control study from Nagaland, India. *Natl Med J India* 2000; 13: 6-8.
41. Yuan JM, Wang XL, Xiang YB et al. Non-dietary risk factors for nasopharyngeal carcinoma in Shanghai, China. *Int J Cancer* 2000; 85: 364-369.
42. Feng BJ, Khyatti M, Ben-Ayoub W et al. Cannabis, tobacco and domestic fumes intake are associated with nasopharyngeal carcinoma in North Africa. *Br J Cancer* 2009; 101: 1207-1212.

43. Hsu WL, Chen JY, Chien YC et al. Independent effect of EBV and cigarette smoking on nasopharyngeal carcinoma: a 20-year follow-up study on 9,622 males without family history in Taiwan. *Cancer Epidemiol Biomarkers Prev* 2009; 18: 1218-1226.
44. Ji X, Zhang W, Xie C et al. Nasopharyngeal carcinoma risk by histologic type in central China: impact of smoking, alcohol and family history. *Int J Cancer* 2011; 129: 724-732.
45. Turkoz FP, Celenkoclu G, Dogu GG et al. Risk factors of nasopharyngeal carcinoma in Turkey-an epidemiological survey of the Anatolian Society of Medical Oncology. *Asian Pac J Cancer Prev* 2011; 12: 3017-3021.
46. Chow WH, McLaughlin JK, Hrubec Z et al. Tobacco use and nasopharyngeal carcinoma in a cohort of US veterans. *Int J Cancer* 1993; 55: 538-540.
47. Hildesheim A, West S, DeVeyra E et al. Herbal medicine use, Epstein-Barr virus, and risk of nasopharyngeal carcinoma. *Cancer Res* 1992; 52: 3048-3051.
48. Tsao SW, Tsang CM, Pang PS et al. The biology of EBV infection in human epithelial cells. *Semin Cancer Biol* 2012; 22: 137-143.
49. Polesel J, Serraino D, Negri E et al. Consumption of fruit, vegetables, and other food groups and the risk of nasopharyngeal carcinoma. *Cancer Causes Control* 2013; 24: 1157-1165.
50. He YQ, Xue WQ, Shen GP et al. Household inhalants exposure and nasopharyngeal carcinoma risk: a large-scale case-control study in Guangdong, China. *BMC Cancer* 2015; 15: 1022.
51. Zou L, Zhong R, Shen N et al. Non-linear dose-response relationship between cigarette smoking and pancreatic cancer risk: evidence from a meta-analysis of 42 observational studies. *Eur J Cancer* 2014; 50: 193-203.
52. Lee YC, Cohet C, Yang YC et al. Meta-analysis of epidemiologic studies on cigarette smoking and liver cancer. *Int J Epidemiol* 2009; 38: 1497-1511.
53. Hunt JD, van der Hel OL, McMillan GP et al. Renal cell carcinoma in relation to cigarette smoking: meta-analysis of 24 studies. *Int J Cancer* 2005; 114: 101-108.
54. Aune D, Vatten LJ, Boffetta P. Tobacco smoking and the risk of gallbladder disease. *Eur J Epidemiol* 2016; 31: 643-653.
55. Furmanski P. Revealing the mechanism of tissue damage due to tobacco use: finally, a smoking gun? *Am J Pathol* 2013; 182: 1489-1493.
56. Salem AF, Al-Zoubi MS, Whitaker-Menezes D et al. Cigarette smoke metabolically promotes cancer, via autophagy and premature aging in the host stromal microenvironment. *Cell Cycle* 2013; 12: 818-825.
57. Corrao G, Zambon A, Conti V et al. Menopause hormone replacement therapy and cancer risk: an Italian record linkage investigation. *Ann Oncol* 2008; 19: 150-155.
58. Peto R, Darby S, Deo H et al. Smoking, smoking cessation, and lung cancer in the UK since 1950: combination of national statistics with two case-control studies. *Bmj* 2000; 321: 323-329.
59. Chang ET, Adami HO. The enigmatic epidemiology of nasopharyngeal carcinoma. *Cancer Epidemiol Biomarkers Prev* 2006; 15: 1765-1777.
60. Nazar-Stewart V, Vaughan TL, Burt RD et al. Glutathione S-transferase M1 and susceptibility to nasopharyngeal carcinoma. *Cancer Epidemiol Biomarkers Prev* 1999; 8: 547-551.
61. Mackay J, Ritthiphakdee B, Reddy KS: Tobacco control in Asia. *Lancet* 2013; 381: 1581-1587.
62. Chua ML, Wee JT, Hui EP, Chan AT. Nasopharyngeal carcinoma. *Lancet* 2016; 387: 1012-1024.

**Table I.** General characteristics of case-control studies used for meta-analysis

| Study                | Region    | Period    | Incidence rate | Cases/Controls | Male/Female | Age range (years old) | Quality score | Source of controls | Matching factors                                      | Adjusting factors                                                                                                                                     |
|----------------------|-----------|-----------|----------------|----------------|-------------|-----------------------|---------------|--------------------|-------------------------------------------------------|-------------------------------------------------------------------------------------------------------------------------------------------------------|
| Mabuchi et al (34)   | the US    | —         | Low            | 39/39          | —           | —                     | 7             | Hospital-based     | Age, sex, race, Education, occupation, marital status | —                                                                                                                                                     |
| Yu et al (37)        | Guangzhou | 1983-1985 | High           | 306/306        | 209/97      | Under 45              | 7             | Population-based   | Age, sex, residence, education                        | Birth place, marital status, dietary risk                                                                                                             |
| Nam et al (35)       | the US    | 1983-1986 | Low            | 204/408        | 141/63      | Under 65              | 5             | Hospital-based     | Age, sex                                              | By multiple logistic regression analysis                                                                                                              |
| Sriamporn et al (36) | Thailand  | 1987-1990 | Moderate       | 120/120        | 81/39       | mean 47.2             | 6             | Hospital-based     | Age, sex                                              | Age, sex, education, residence, occupation, consumption of salted fish and alcohol                                                                    |
| Zhu et al (38)       | the US    | 1984-1988 | Low            | 113/1910       | male        | —                     | 8             | Population-based   | —                                                     | Birth, education, background, medical history, occupation, alcohol intake                                                                             |
| Vaughan et al (39)   | the US    | 1987-1993 | Low            | 231/244        | 154/77      | mean 55.2             | 9             | Population-based   | Age, sex, region                                      | Age, sex, alcohol use, education                                                                                                                      |
| Cheng et al (7)      | Taiwan    | 1991-1994 | Moderate       | 375/327        | 260/115     | mean 46 (15-74)       | 7             | Population-based   | Age, sex, residence, education, marital status        | Age, sex, race, education, family history of NPC, drinking status                                                                                     |
| Chelleng et al (40)  | India     | 1996-1997 | Moderate       | 47/94          | 34/13       | mean 43.7             | 6             | Population-based   | Age, sex, ethnicity                                   | —                                                                                                                                                     |
| Yuan et al (41)      | Shanghai  | 1987-1991 | Moderate       | 935/1032       | 668/267     | mean 50               | 8             | Population-based   | Age, sex, residence                                   | Age, gender, education, intake frequencies of preserved foods, occupational exposure history of chronic ear and nose condition, family history of NPC |



Table I. Continued

| Study               | Region       | Period    | Incidence rate | Cases/ Controls | Male/ Female | Age range (years old) | Quality score | Source of controls | Matching factors                                      | Adjusting factors                                                                                                                                        |
|---------------------|--------------|-----------|----------------|-----------------|--------------|-----------------------|---------------|--------------------|-------------------------------------------------------|----------------------------------------------------------------------------------------------------------------------------------------------------------|
| Zou et al (51)      | Yangjiang    | 1987-1995 | High           | 97/192          | 83/14        | mean 52.6 (30-82)     | 7             | Population-based   | Age, sex, occupation                                  | —                                                                                                                                                        |
| Feng et al (42)     | North Africa | 2002-2005 | Moderate       | 440/409         | male         | —                     | 7             | Hospital-based     | Age, sex, ethnicity, center, childhood household type | Age, socioeconomic status, dietary risk factors                                                                                                          |
| Ji et al (44)       | Wuhan        | 1991-2009 | Moderate       | 1044/1095       | 755/289      | —                     | 5             | —                  | Age, sex, ethnicity                                   | Age, gender, cigarette, alcohol intake, family history                                                                                                   |
| Polesel et al (9)   | Italy        | 1992-2008 | Low            | 150/450         | 119/31       | median 52 (18-76)     | 6             | Hospital-based     | Age, sex, residence                                   | Age, sex, place of residence, education, alcohol intake                                                                                                  |
| Turkoz et al (45)   | Turkey       | —         | Moderate       | 183/183         | 122/61       | mean 44.9 (18-75)     | 6             | Hospital-based     | Age, sex                                              | Age, sex                                                                                                                                                 |
| Fachiroh et al (23) | Thailand     | 2005-2010 | Moderate       | 681/1078        | 504/177      | mean 49.8             | 6             | Hospital-based     | Age, sex, residence                                   | Age group, sex, center, education, alcohol drinking                                                                                                      |
| Lye et al (25)      | Malaysia     | 2007      | Moderate       | 356/356         | 276/80       | mean 53.2             | 6             | Hospital-based     | Age, sex, ethnicity                                   | Age, sex, ethnicity, salted fish and alcohol intake                                                                                                      |
| Xie et al (26)      | Hong Kong    | 2010-2012 | High           | 352/410         | 253/99       | mean 51.6             | 8             | Population-based   | Age, sex, ethnicity, residence district               | Age, sex, education, house type, family history of NPC, environmental tobacco smoke exposure, dietary risk, occupational exposure and cooking experience |

**Table II.** General characteristics of cohort studies used for meta-analysis

| Study              | Region    | Period    | Incidence rate | Cohort size | No. of cases | Years of follow-up | End-point | Quality score | Source of cohort            | Adjusting factors                                     |
|--------------------|-----------|-----------|----------------|-------------|--------------|--------------------|-----------|---------------|-----------------------------|-------------------------------------------------------|
| Chow et al (46)    | the US    | 1954-1980 | Low            | 248046      | 48           | 26                 | Mortality | 6             | Veterans                    | Age, calendar year                                    |
| Friborg et al (10) | Singapore | 1993-2005 | High           | 61320       | 173          | 12                 | Morbidity | 9             | Population-based            | Age, sex, dialect group, year of interview, education |
| Hsu et al (43)     | Taiwan    | 1984-2006 | Moderate       | 9622        | 32           | mean 18.1          | Incidence | 9             | Population-based            | Age, two anti-EBV viral serum-markers                 |
| Lin et al (24)     | Guangzhou | 1988-1999 | High           | 101823      | 34           | mean 7.3           | Incidence | 8             | Factory workers and drivers | Age, sex, education, drinking status, occupation      |

**Table III.** Subgroup analysis on pooled ORs for the association between cigarette smoking and nasopharyngeal carcinoma.

| Subgroup                       | No. of Studies | Effect estimate (95% CI) | Heterogeneity $I^2, P$ | Egger's Test $P$ value | Adjusted for Publication Bias |
|--------------------------------|----------------|--------------------------|------------------------|------------------------|-------------------------------|
| <i>Smoking status</i>          |                |                          |                        |                        |                               |
| Ever smokers                   | 19             | 1.56(1.32-1.83)          | 66.8%, <.01            | 0.29                   | 1.56(1.32-1.84)               |
| Current smokers                | 11             | 1.59 (1.35-1.89)         | 32.5%, .14             | 0.10                   |                               |
| Former smokers                 | 10             | 1.36 (1.15-1.61)         | 2.3%, .42              | 0.97                   |                               |
| <i>Design</i>                  |                |                          |                        |                        |                               |
| Case-control                   |                |                          |                        |                        |                               |
| Current smokers                | 8              | 1.67(1.06-2.61)          | 22.6%, .25             | 0.58                   |                               |
| Former smokers                 | 8              | 1.45(1.21-1.73)          | 0.0%, .70              | 0.98                   |                               |
| Cohort                         |                |                          |                        |                        |                               |
| Current smokers                | 3              | 2.19(1.02-4.72)          | 65%, .06               | 0.16                   |                               |
| Former smokers                 | 2              | 0.87(0.54-1.41)          | 0.0%, .37              | —                      |                               |
| <i>Pack-years</i>              |                |                          |                        |                        |                               |
| <30                            | 7              | 1.34 (1.13-1.58)         | 0.0%, .73              | 0.54                   |                               |
| ≥30                            | 6              | 2.03 (1.57-2.61)         | 0.0%, .45              | <0.01                  | 1.80(1.37-2.36)               |
| <i>Age at onset of smoking</i> |                |                          |                        |                        |                               |
| <18y                           | 5              | 1.78 (1.41-2.25)         | 0.0%, .94              | 0.46                   |                               |
| ≥18y                           | 5              | 1.28 (1.00-1.64)         | 0.0%, .86              | 0.93                   |                               |
| <i>Incidence rate</i>          |                |                          |                        |                        |                               |
| Low                            | 5              | 1.68 (1.36-2.07)         | 0.0%, .84              | 0.64                   |                               |
| Intermediate                   | 10             | 1.59 (1.21-2.09)         | 78.8%, <.01            | 0.29                   |                               |
| High                           | 4              | 1.27 (1.05-1.53)         | 0.0%, .52              | 0.63                   |                               |
| <i>Gender</i>                  |                |                          |                        |                        |                               |
| Male                           | 5              | 1.36 (1.15-1.60)         | 0.0%, .68              | 0.48                   |                               |
| Female                         | 2              | 1.58 (0.99-2.53)         | 0.0%, .64              | —                      |                               |
| <i>Histological type</i>       |                |                          |                        |                        |                               |
| Differentiated                 | 5              | 2.34 (1.77-3.09)         | 0.0%, .72              | 0.64                   |                               |
| Undifferentiated               | 4              | 1.15 (0.90-1.46)         | 0.0%, .02              | 0.28                   |                               |
| <i>Adjustment</i>              |                |                          |                        |                        |                               |
| Adjusted                       | 13             | 1.55 (1.26-1.91)         | 75.4%, <.01            | 0.33                   |                               |
| Unadjusted                     | 6              | 1.57 (1.27-1.93)         | 0.0%, .68              | 0.93                   |                               |

1  
2  
3  
4  
5  
6  
7  
8  
9  
10  
11  
12  
13  
14  
15  
16  
17  
18  
19  
20  
21  
22  
23  
24  
25  
26  
27  
28  
29  
30  
31  
32  
33  
34  
35  
36  
37  
38  
39  
40  
41  
42  
43  
44  
45  
46  
47  
48  
49  
50  
51  
52  
53  
54  
55  
56  
57  
58  
59  
60

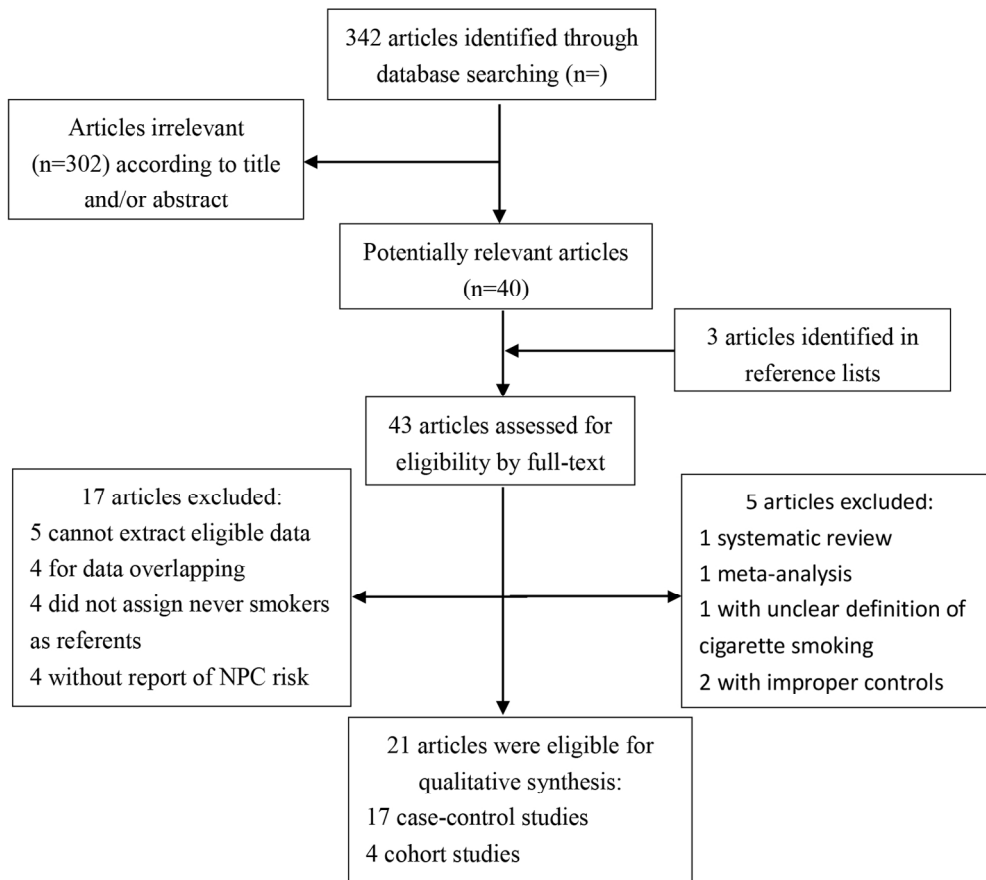

Summary of literature search.

160x142mm (300 x 300 DPI)

only

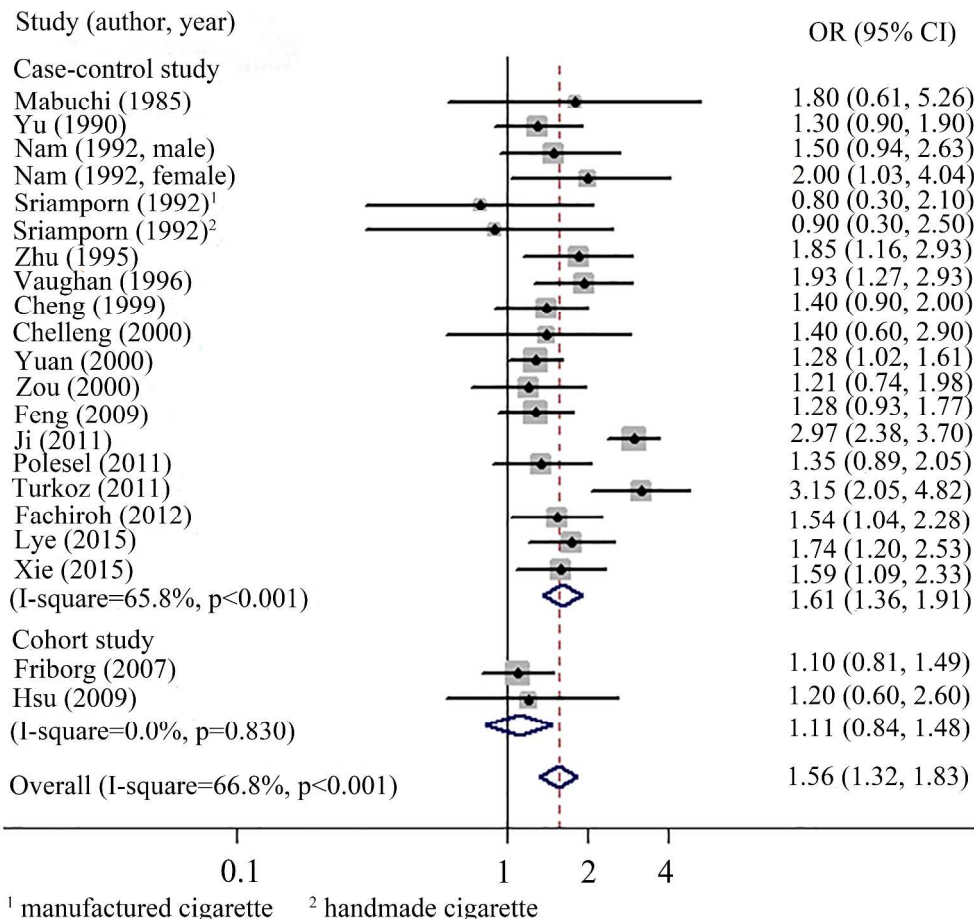

Forest plots for comparing the risk for NPC between ever smokers versus never smokers.

1  
2  
3  
4  
5  
6  
7  
8  
9  
10  
11  
12  
13  
14  
15  
16  
17  
18  
19  
20  
21  
22  
23  
24  
25  
26  
27  
28  
29  
30  
31  
32  
33  
34  
35  
36  
37  
38  
39  
40  
41  
42  
43  
44  
45  
46  
47  
48  
49  
50  
51  
52  
53  
54  
55  
56  
57  
58  
59  
60

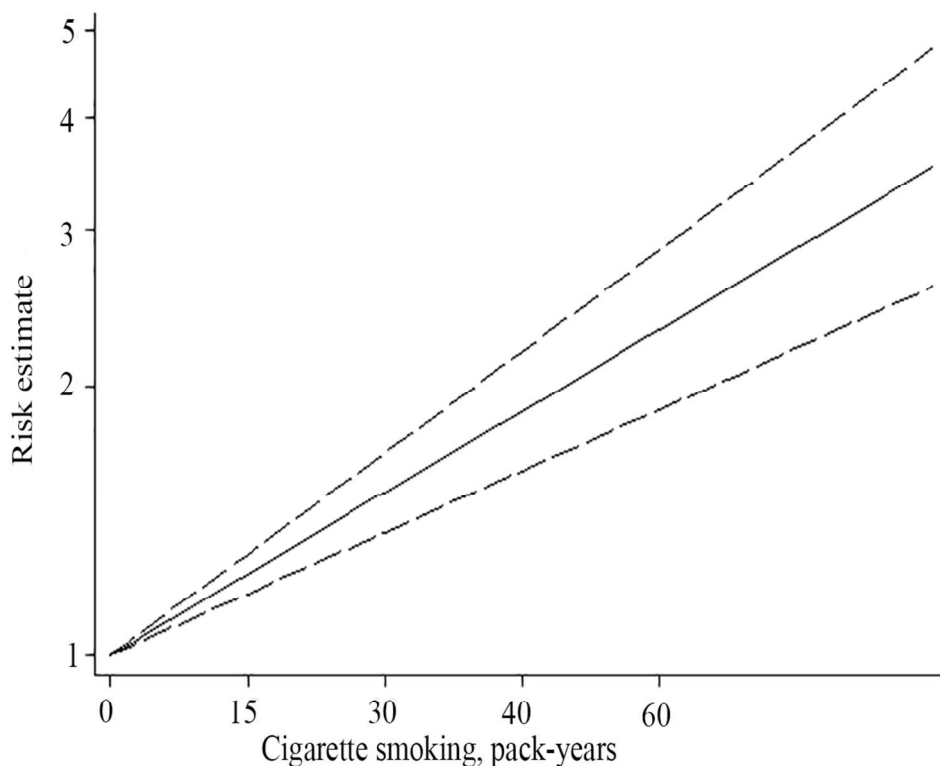

A linear relationship between the cumulative number of pack-years and NPC risk (P for linearity=0.83), with a 15% (95% CI: 1.11-1.19, P<0.001) increasing risk of NPC for every additional 10 pack-years smoked in comparison with never smokers (The solid line depicts the pooled risk estimate of NPC associated with each 1-pack-year increment of cigarette smoking, the dashed line depicts the upper confidence interval, the dot line depicts the lower confidence interval).

99x82mm (300 x 300 DPI)

only

1  
2  
3  
4  
5  
6  
7  
8  
9  
10  
11  
12  
13  
14  
15  
16  
17  
18  
19  
20  
21  
22  
23  
24  
25  
26  
27  
28  
29  
30  
31  
32  
33  
34  
35  
36  
37  
38  
39  
40  
41  
42  
43  
44  
45  
46  
47  
48  
49  
50  
51  
52  
53  
54  
55  
56  
57  
58  
59  
60

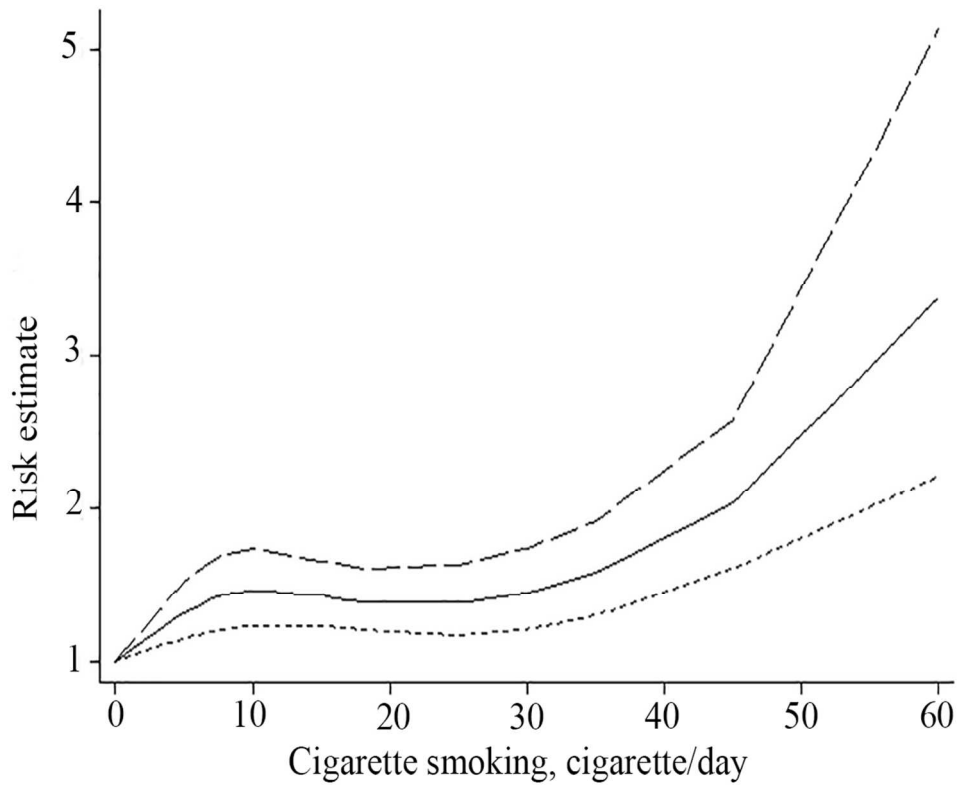

A non-linear association between intensity of cigarette smoking and NPC risk (P for non-linearity<0.05) (The solid line depicts the pooled risk estimate of NPC associated with each 1 cigarette/day increment, the dashed lines depict the upper and the lower confidence interval, respectively).

99x82mm (300 x 300 DPI)

only

1  
2  
3  
4  
5  
6  
7  
8  
9  
10  
11  
12  
13  
14  
15  
16  
17  
18  
19  
20  
21  
22  
23  
24  
25  
26  
27  
28  
29  
30  
31  
32  
33  
34  
35  
36  
37  
38  
39  
40  
41  
42  
43  
44  
45  
46  
47  
48  
49  
50  
51  
52  
53  
54  
55  
56  
57  
58  
59  
60

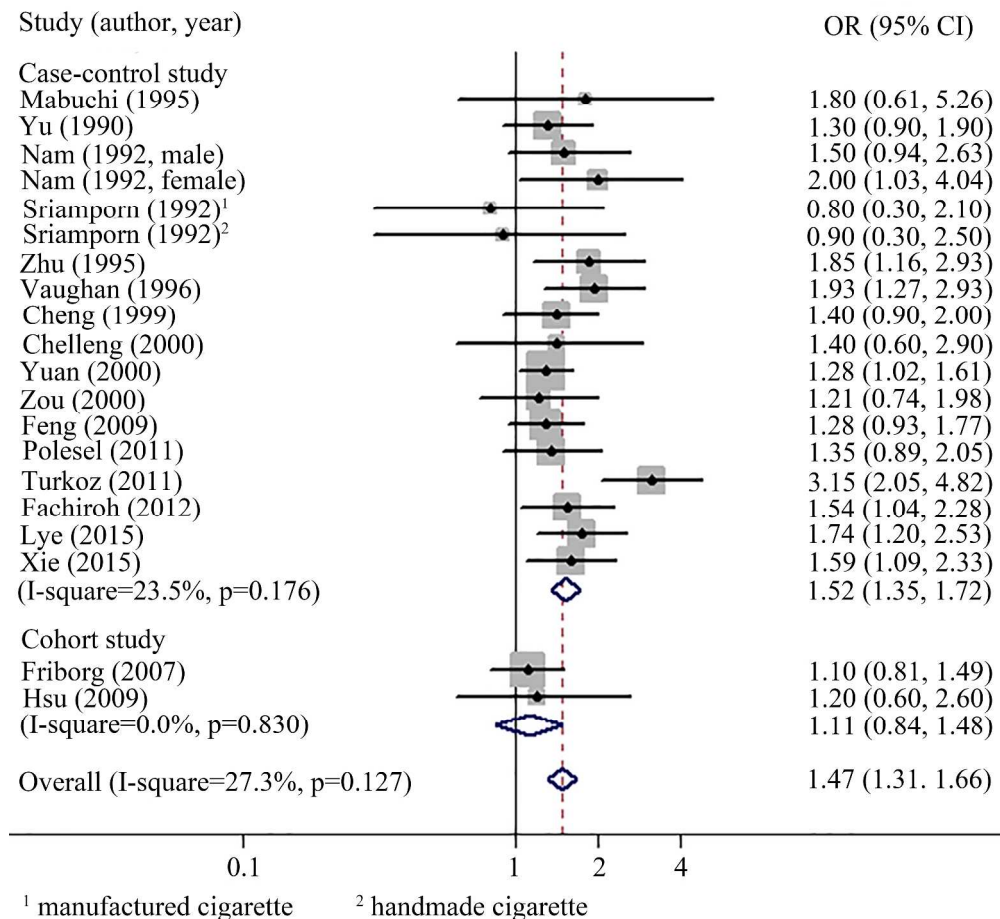

Forest plots for comparing the risk for NPC between ever smokers versus never smokers after deleting the Ji 2011 study.

Only



## STROBE Statement—checklist of items that should be included in reports of observational studies

|                           | Item No | Recommendation                                                                                                                                                                                                                                                                                                                                                                                                                                                                                                                                                                                                                                                                                                                      |
|---------------------------|---------|-------------------------------------------------------------------------------------------------------------------------------------------------------------------------------------------------------------------------------------------------------------------------------------------------------------------------------------------------------------------------------------------------------------------------------------------------------------------------------------------------------------------------------------------------------------------------------------------------------------------------------------------------------------------------------------------------------------------------------------|
| <b>Title and abstract</b> | 1       | (a) Indicate the study's design with a commonly used term in the title or the abstract<br><b>Page 1</b><br>(b) Provide in the abstract an informative and balanced summary of what was done and what was found <b>Page 2</b>                                                                                                                                                                                                                                                                                                                                                                                                                                                                                                        |
| <b>Introduction</b>       |         |                                                                                                                                                                                                                                                                                                                                                                                                                                                                                                                                                                                                                                                                                                                                     |
| Background/rationale      | 2       | Explain the scientific background and rationale for the investigation being reported:<br><b>Page 4</b>                                                                                                                                                                                                                                                                                                                                                                                                                                                                                                                                                                                                                              |
| Objectives                | 3       | State specific objectives, including any prespecified hypotheses <b>Page 4-5</b>                                                                                                                                                                                                                                                                                                                                                                                                                                                                                                                                                                                                                                                    |
| <b>Methods</b>            |         |                                                                                                                                                                                                                                                                                                                                                                                                                                                                                                                                                                                                                                                                                                                                     |
| Study design              | 4       | Present key elements of study design early in the paper <b>Page 1-2</b>                                                                                                                                                                                                                                                                                                                                                                                                                                                                                                                                                                                                                                                             |
| Setting                   | 5       | Describe the setting, locations, and relevant dates, including periods of recruitment, exposure, follow-up, and data collection <b>Page 5-7</b>                                                                                                                                                                                                                                                                                                                                                                                                                                                                                                                                                                                     |
| Participants              | 6       | (a) <i>Cohort study</i> —Give the eligibility criteria, and the sources and methods of selection of participants. Describe methods of follow-up<br><i>Case-control study</i> —Give the eligibility criteria, and the sources and methods of case ascertainment and control selection. Give the rationale for the choice of cases and controls<br><i>Cross-sectional study</i> —Give the eligibility criteria, and the sources and methods of selection of participants<br>(b) <i>Cohort study</i> —For matched studies, give matching criteria and number of exposed and unexposed<br><i>Case-control study</i> —For matched studies, give matching criteria and the number of controls per case<br><b>Page 6 and Table 1&amp;2</b> |
| Variables                 | 7       | Clearly define all outcomes, exposures, predictors, potential confounders, and effect modifiers. Give diagnostic criteria, if applicable                                                                                                                                                                                                                                                                                                                                                                                                                                                                                                                                                                                            |
| Data sources/measurement  | 8*      | For each variable of interest, give sources of data and details of methods of assessment (measurement). Describe comparability of assessment methods if there is more than one group <b>Page 5</b>                                                                                                                                                                                                                                                                                                                                                                                                                                                                                                                                  |
| Bias                      | 9       | Describe any efforts to address potential sources of bias <b>Page 3</b>                                                                                                                                                                                                                                                                                                                                                                                                                                                                                                                                                                                                                                                             |
| Study size                | 10      | Explain how the study size was arrived at <b>Page 2 or 7</b>                                                                                                                                                                                                                                                                                                                                                                                                                                                                                                                                                                                                                                                                        |
| Quantitative variables    | 11      | Explain how quantitative variables were handled in the analyses. If applicable, describe which groupings were chosen and why <b>Page 5-6</b>                                                                                                                                                                                                                                                                                                                                                                                                                                                                                                                                                                                        |
| Statistical methods       | 12      | (a) Describe all statistical methods, including those used to control for confounding<br>(b) Describe any methods used to examine subgroups and interactions<br>(c) Explain how missing data were addressed<br>(d) <i>Cohort study</i> —If applicable, explain how loss to follow-up was addressed<br><i>Case-control study</i> —If applicable, explain how matching of cases and controls was addressed<br><i>Cross-sectional study</i> —If applicable, describe analytical methods taking account of sampling strategy<br>(e) Describe any sensitivity analyses<br><b>Page 6-7</b>                                                                                                                                                |

**Results**

|                  |     |                                                                                                                                                                                                                                                                                                                                                                                                                                   |
|------------------|-----|-----------------------------------------------------------------------------------------------------------------------------------------------------------------------------------------------------------------------------------------------------------------------------------------------------------------------------------------------------------------------------------------------------------------------------------|
| Participants     | 13* | (a) Report numbers of individuals at each stage of study—eg numbers potentially eligible, examined for eligibility, confirmed eligible, included in the study, completing follow-up, and analysed<br>(b) Give reasons for non-participation at each stage<br>(c) Consider use of a flow diagram<br><b>Page 7-8</b>                                                                                                                |
| Descriptive data | 14* | (a) Give characteristics of study participants (eg demographic, clinical, social) and information on exposures and potential confounders<br>(b) Indicate number of participants with missing data for each variable of interest<br>(c) <i>Cohort study</i> —Summarise follow-up time (eg, average and total amount)<br><b>Page 8</b>                                                                                              |
| Outcome data     | 15* | <i>Cohort study</i> —Report numbers of outcome events or summary measures over time<br><i>Case-control study</i> —Report numbers in each exposure category, or summary measures of exposure<br><i>Cross-sectional study</i> —Report numbers of outcome events or summary measures<br><b>Page 7-8</b>                                                                                                                              |
| Main results     | 16  | (a) Give unadjusted estimates and, if applicable, confounder-adjusted estimates and their precision (eg, 95% confidence interval). Make clear which confounders were adjusted for and why they were included<br>(b) Report category boundaries when continuous variables were categorized<br>(c) If relevant, consider translating estimates of relative risk into absolute risk for a meaningful time period<br><b>Page 8-11</b> |
| Other analyses   | 17  | Report other analyses done—eg analyses of subgroups and interactions, and sensitivity analyses <b>Page 10-11</b>                                                                                                                                                                                                                                                                                                                  |

**Discussion**

|                  |    |                                                                                                                                                                                              |
|------------------|----|----------------------------------------------------------------------------------------------------------------------------------------------------------------------------------------------|
| Key results      | 18 | Summarise key results with reference to study objectives <b>Page 11-14</b>                                                                                                                   |
| Limitations      | 19 | Discuss limitations of the study, taking into account sources of potential bias or imprecision. Discuss both direction and magnitude of any potential bias <b>Page 15</b>                    |
| Interpretation   | 20 | Give a cautious overall interpretation of results considering objectives, limitations, multiplicity of analyses, results from similar studies, and other relevant evidence <b>Page 11-14</b> |
| Generalisability | 21 | Discuss the generalisability (external validity) of the study results <b>Page 14-15</b>                                                                                                      |

**Other information**

|         |    |                                                                                                                                                                              |
|---------|----|------------------------------------------------------------------------------------------------------------------------------------------------------------------------------|
| Funding | 22 | Give the source of funding and the role of the funders for the present study and, if applicable, for the original study on which the present article is based <b>Page 16</b> |
|---------|----|------------------------------------------------------------------------------------------------------------------------------------------------------------------------------|

\*Give information separately for cases and controls in case-control studies and, if applicable, for exposed and unexposed groups in cohort and cross-sectional studies.

**Note:** An Explanation and Elaboration article discusses each checklist item and gives methodological background and published examples of transparent reporting. The STROBE checklist is best used in conjunction with this article (freely available on the Web sites of PLoS Medicine at <http://www.plosmedicine.org/>, Annals of Internal Medicine at <http://www.annals.org/>, and Epidemiology at <http://www.epidem.com/>). Information on the STROBE Initiative is available at [www.strobe-statement.org](http://www.strobe-statement.org).

## MOOSE Checklist for Meta-analyses of Observational Studies

| Item No                                     | Recommendation                                                                                                                                                                                                                                                               | Reported on Page No |
|---------------------------------------------|------------------------------------------------------------------------------------------------------------------------------------------------------------------------------------------------------------------------------------------------------------------------------|---------------------|
| Reporting of background should include      |                                                                                                                                                                                                                                                                              |                     |
| 1                                           | Problem definition                                                                                                                                                                                                                                                           | 4                   |
| 2                                           | Hypothesis statement                                                                                                                                                                                                                                                         | 5                   |
| 3                                           | Description of study outcome(s)                                                                                                                                                                                                                                              | 5                   |
| 4                                           | Type of exposure or intervention used                                                                                                                                                                                                                                        | 4                   |
| 5                                           | Type of study designs used                                                                                                                                                                                                                                                   | 4                   |
| 6                                           | Study population                                                                                                                                                                                                                                                             | 8                   |
| Reporting of search strategy should include |                                                                                                                                                                                                                                                                              |                     |
| 7                                           | Qualifications of searchers (eg, librarians and investigators)                                                                                                                                                                                                               | None                |
| 8                                           | Search strategy, including time period included in the synthesis and key words                                                                                                                                                                                               | 5                   |
| 9                                           | Effort to include all available studies, including contact with authors                                                                                                                                                                                                      | 5                   |
| 10                                          | Databases and registries searched                                                                                                                                                                                                                                            | 5                   |
| 11                                          | Search software used, name and version, including special features used (eg, explosion)                                                                                                                                                                                      | 5                   |
| 12                                          | Use of hand searching (eg, reference lists of obtained articles)                                                                                                                                                                                                             | 5                   |
| 13                                          | List of citations located and those excluded, including justification                                                                                                                                                                                                        | 7                   |
| 14                                          | Method of addressing articles published in languages other than English                                                                                                                                                                                                      | 5                   |
| 15                                          | Method of handling abstracts and unpublished studies                                                                                                                                                                                                                         | 7                   |
| 16                                          | Description of any contact with authors                                                                                                                                                                                                                                      | None                |
| Reporting of methods should include         |                                                                                                                                                                                                                                                                              |                     |
| 17                                          | Description of relevance or appropriateness of studies assembled for assessing the hypothesis to be tested                                                                                                                                                                   | 5                   |
| 18                                          | Rationale for the selection and coding of data (eg, sound clinical principles or convenience)                                                                                                                                                                                | 5                   |
| 19                                          | Documentation of how data were classified and coded (eg, multiple raters, blinding and interrater reliability)                                                                                                                                                               | 6                   |
| 20                                          | Assessment of confounding (eg, comparability of cases and controls in studies where appropriate)                                                                                                                                                                             | 6                   |
| 21                                          | Assessment of study quality, including blinding of quality assessors, stratification or regression on possible predictors of study results                                                                                                                                   | 6                   |
| 22                                          | Assessment of heterogeneity                                                                                                                                                                                                                                                  | 7                   |
| 23                                          | Description of statistical methods (eg, complete description of fixed or random effects models, justification of whether the chosen models account for predictors of study results, dose-response models, or cumulative meta-analysis) in sufficient detail to be replicated | 6                   |
| 24                                          | Provision of appropriate tables and graphics                                                                                                                                                                                                                                 | 7                   |
| Reporting of results should include         |                                                                                                                                                                                                                                                                              |                     |
| 25                                          | Graphic summarizing individual study estimates and overall estimate                                                                                                                                                                                                          | 8                   |
| 26                                          | Table giving descriptive information for each study included                                                                                                                                                                                                                 | 20                  |
| 27                                          | Results of sensitivity testing (eg, subgroup analysis)                                                                                                                                                                                                                       | 9                   |
| 28                                          | Indication of statistical uncertainty of findings                                                                                                                                                                                                                            | 11                  |

| Item No                                 | Recommendation                                                                                                            | Reported on Page No |
|-----------------------------------------|---------------------------------------------------------------------------------------------------------------------------|---------------------|
| Reporting of discussion should include  |                                                                                                                           |                     |
| 29                                      | Quantitative assessment of bias (eg, publication bias)                                                                    | 12, 14              |
| 30                                      | Justification for exclusion (eg, exclusion of non-English language citations)                                             | None                |
| 31                                      | Assessment of quality of included studies                                                                                 | 12                  |
| Reporting of conclusions should include |                                                                                                                           |                     |
| 32                                      | Consideration of alternative explanations for observed results                                                            | 15                  |
| 33                                      | Generalization of the conclusions (ie, appropriate for the data presented and within the domain of the literature review) | 14                  |
| 34                                      | Guidelines for future research                                                                                            | 15                  |
| 35                                      | Disclosure of funding source                                                                                              | 16                  |

From: Stroup DF, Berlin JA, Morton SC, et al, for the Meta-analysis Of Observational Studies in Epidemiology (MOOSE) Group. Meta-analysis of Observational Studies in Epidemiology. A Proposal for Reporting. *JAMA*. 2000;283(15):2008-2012. doi: 10.1001/jama.283.15.2008.

Transcribed from the original paper within the NEUROSURGERY® Editorial Office, Atlanta, GA, United States. August 2012.
